# Supplementary material
Source: PubMed Central journal article supplement (PMC3475194)
Supplement: supp_WNL.0b013e3181a6b312_Harden_73-2-133.pdf [file supp_WNL.0b013e3181a6b312_Harden_73-2-133.pdf]

## 최신 치료 권고안: 여성 간질 환자의 치료 방안에 관한 문제-임신에 초점(근거 중심 고찰): 기형 발생과 주산기 예측

Practice Parameter update: Management issues for women with epilepsy- Focus on pregnancy (an evidence-based review); Teratogenesis and perinatal outcomes

Report of the Quality Standards Subcommittee and Therapeutics and Technology Assessment Subcommittee of the American Academy of Neurology and American Epilepsy Society

C.L. Harden, MD  
K.J. Meador, MD  
P.B. Pennell, MD  
W.A. Hauser, MD  
G.S. Gronseth, MD  
J.A. French, MD  
S. Wiebe, MD  
D. Thurman, MD, MPH  
B.S. Koppel, MD  
P.W. Kaplan, MB, FRCP  
J.N. Robinson, MD  
J. Hopp, MD  
T.Y. Ting, MD  
B. Gidal, PharmD  
C.A. Hovinga, PharmD  
A.N. Wilner, MD  
B. Vazquez, MD  
L. Holmes, MD  
A. Krumholz, MD  
R. Finnell, PhD  
D. Hirtz, MD  
C. Le Guen

**목적**: 여성 간질 환자(women with epilepsy, WVE)의 임신 기간 중 치료와 관련된 여러 문제점에 대한 근거를 재평가하기 위함이다.

**방법**: 1985년 1월~2007년 6월에 발표된 관련 논문의 체계적 고찰을 통하여 이루어졌다.

**결과**: 임신 첫 3개월 동안 자궁 내 valproate(VPA)의 노출로 인한 중요 선천성 기형(major congenital malformations, MCMs)의 발생 위험이 carbamazepine, phenytoin이나 lamotrigine에 비하여 높다고 판단된다. 항간질 약물(antiepileptic drug, AED)을 사용하지 않은 여성 간질 환자와 비교하였을 때, 복합요법의 일부로 사용한 VPA는 MCMs를 유발할 가능성이 높고, VPA를 단일요법으로 사용하였을 때에도 MCMs의 가능성이 있다. 항간질 약물 복합요법은 단일요법과 비교하여 MCMs와 인지기능 저하를 일으킬 가능성이 높다. 단일요법으로 VPA의 자궁 내 노출은 인지기능 저하를 유발하고, phenytoin이나 phenobarbital의 단일요법에 의한 자궁 내 노출로도 인지기능 저하가 일어날 수 있다. AEDs를 복용하는 여성 간질 환자에서 태어난 신생아는 재태 연령에 비하여 적은 몸무게로 태어날 위험이 높고, 1-minute Apgar score가 7점 미만일 위험이 증가할 수 있다.

**권고**: 중요 선천성 기형의 발생 위험을 줄이기 위하여 임신 첫 3개월 동안 가능한 한 VPA와 AED 복합요법을 사용하지 않도록 하여야 한다(Level B). 자녀의 인지기능 저하를 예방하기 위하여 임신 기간 동안 가능한 한 VPA와 AED 복합요법을 사용하지 않도록 하여야 한다(Level B). 자녀의 인지기능 저하를 예방하기 위하여 임신 기간 중 가능한 한 phenytoin과 phenobarbital 사용 중지를 고려하여야 한다(Level C). 임신에 따른 위험도 분류에 AEDs를 복용 중인 여성 간질 환자의 신생아에서 아마도 재태 연령에 비한 저체중의 위험이 높고(Level B), 1-minute Apgar scores가 7점 미만일 위험이 높을 수 있다는 점이 포함되어야 한다(Level C).

Neurology® 2009;73:133-141

미국 인구 추정치<sup>1</sup>와 간질 유병률<sup>2</sup>을 고려하면 여성 간질 환자의 약 50만 명이 가임기 여성이다. 또한 1,000명의 분만 건당 3-5명의 신생아가 여성 간질 환자가 될 것이라는 추정이 있다.<sup>3</sup> 간질은 반복적이고 unprovoked 경련 발작으로 정의되며, 간질 치료는 일반적으로 AED를 오랜 기간 동안 매일 복용하는 것이다. 대부분의 간질 환자들은 경련 발작이 잘 조절되며, 간질 이외에는 다른 건강에 이상이 없기 때문에, 임신을 포함한 모든 삶을 영위하기를 기대하고 있다.

이번 권고안에서는 임신 중이거나 임신을 계획 중인 여성 간질 환자의 임상치료에 관한 세 가지 중요한 문제에 대한 근거를 요약하였다.

1. 여성 간질 환자에서 태어난 신생아에서 자궁 내 AED 노출에 따른 중요 선천성 기형(MCMs)의 위험성은 어느 정도인가?
2. 여성 간질 환자의 자녀들에서 오랜 시간 후에 인지기능 부작용의 위험은 어느 정도인가?
3. 여성 간질 환자에서 태어난 신생아에서 사망, 출산 시 저체중과 출산 시 낮은 Apgar scores의 위험은 어느 정도인가?

## DESCRIPTION OF THE ANALYTIC PROCESS

위원회 결성, 관련 문헌 조사 전략과 관련 문헌 분석 과정에 관한 사항은 이전 논문에서 기술되었다.<sup>4</sup>

## ANALYSIS OF EVIDENCE

### 1. Major congenital malformations.

문헌 조사를 통하여 52개의 관련 논문을 찾았다. 인과관계에 대한 근거를 기준으로 분류한 미국신경과학회(American Academy of Neurology, AAN) 진단 기준을 사용하여 오류(bias)의 위험도에 따라 논문을 분류하였다(appendix c-4A on the *Neurology*<sup>®</sup> Web site at [www.neurology.org](http://www.neurology.org)). 결론에 기여하는 정도가 Class III이거나 그 이상에 해당하는 연구는 table c-1에서 c-5까지 요약하였다.

MCMs는 외과적, 내과적 또는 미용학적 중요성을 동반한 구조 이상으로 정의되었다.<sup>5</sup> Facial dysmorphism과 같은 심각하지 않은 기형은 통계 분석에서 제외되었다. 이러한 권고안을 위하여 MCMs의 여부는 객관적인 결과로 간주되었다. Class I 또는 Class II의 연구가 되기 위해서는 모성 연령과 사회경제학적 상태로 인하여 발생한 혼란 요인에 대한 설명이 추가되어야 했다.

여성 간질이 MCMs에 기여하는 위험은 그 근거가 불확실하고, 근거가 있다고 하더라도 미약하기 때문에 여기에서는 특별히 고려하지 않았다.<sup>6</sup> 하지만, 여성 간질로 인한 MCMs의 위험이 존재하지 않는다고 말할 수는 없다. 따라서 우리는 AEDs를 복용하지 않은 여성 간질 환자를 대조군으로 한 연구들만 포함하여, 임신 첫 3개월 동안 AEDs를 복용하여 MCMs의 위험이 증가하는지에 대한 의문을 해결하려고 하였다. 우리는 발작 유형과 횟수에 따른 여성 간질의 증증도를 비교 그룹들 간에 완전히 일치시킬 수 없었기 때문에, 이로 인하여 두 군간 결과의 차이가 유발될 수 있다는 점을 인정한다. 간질 이외의 이유로 AEDs를 복용하고 있는 간질이 없는 여성 환자들은 연구에서 배제되었다.

추가적으로 서로 다른 AEDs 간 위험성 비교 및 용량 기형 관계와 같은 개별 AED와 연관된 특정 소견의 평가에 중점을 두었다. 따라서 이러한 의문점<sup>7,8</sup>을 해결하려고 한 3개의 연구에는 간질과 다른 이유로 AEDs를 복용한 여성들의 자녀들이 포함되었다.

### 2. 임신 첫 3개월 동안 복용한 AEDs가, 복용군의 자녀들에서 AEDs를 복용하지 않은 여성 간질 환자의 자녀와 비교하였을 때 MCMs의 위험을 증가시키는가?

#### 1) AEDs in general.

Class I의 한 연구<sup>10</sup>에서 AEDs를 복용한 여성 간질 환자의 자녀들이 AEDs를 복용하지 않은 여성 간질 환자의 자녀들에 비하여 MCMs의 위험이 증가하지 않았다(relative risk [RR] 1.19, confidence interval [CI] 0.59~2.40). 하지만 이 연구는 실질적인 위험의 증가를 배제할 수 있을 만큼 충분히 민감하지 못하였다. 2개의 Class II 연구(odds ratio [OR] 3.92, CI 1.29~11.90,<sup>5</sup> OR 1.70, CI 1.07~2.68)<sup>11</sup>에서는 AEDs를 복용 중인 엄마에서 복용하지 않은 엄마에 비해 MCMs의 위험이 증가한다고 밝혀졌다.

#### 2) Valproate.

한 Class II 연구<sup>11</sup>에서 valproate (VPA) 단독요법(OR 4.18, CI 2.31~7.57)이나 복합요법(OR 3.54, CI 1.42~8.11)을 사용한 여성 간질 환자의 자녀에서 MCMs의 위험이 증가한다고 보고하였다. 또 한 Class I 연구<sup>10</sup>에서도 VPA가 포함된 복합요법을 사용한 여성 간질 환자에서 약물 치료를 하지 않은 환자들에 비하여 MCMs의 위험이 증가하였다(RR 2.52, CI 1.17~5.44).

#### 3) Carbamazepine.

한 Class I 연구<sup>10</sup>에서는 carbamazepine (CBZ)을 복용 중인 여성 간질 환자의 자녀에서 MCMs의 위험이 증가하지 않았다(RR 0.63, CI 0.28~1.41).

#### 4) Lamotrigine.

한 Class I 연구<sup>10</sup>에서는 lamotrigine (LTG)을 복용 중인 여성 간질 환자의 자녀에서 MCMs의 위험이 증가하지 않았지만(RR 0.92, CI 0.41~2.05), 실질적인 위험의 증가를 배제할 수 있을 정도로 민감하지 않았다.

AED당 적어도 80개의 결과가 있는 가장 광범위한 Class I 연구<sup>10</sup>에서 MCMs의 절대 위험도는 다음과 같다: CBZ (n=900) 2.2% (CI 1.4~3.4), VPA (n=715) 6.2% (CI 4.6~8.8), LTG (n=647) 3.2%(CI 2.1~4.9), phenytoin (PHT) (n=82) 3.7% (CI 1.3~10.2).

#### 5) 결론

- 임신 첫 3개월 동안 복용한 AEDs는 여성 간질 환자의 자녀에서 MCMs의 위험도를 아마도 증가시킬 수 있지만(two adequately sensitive

Class II studies), 그러한 위험이 모든 AEDs로 인한 것인지, 혹은 한 두 가지의 AEDs로 인한 것인지 판단할 수 없다.

- 임신 첫 3개월 동안 VPA 단독요법으로 여성 간질 환자의 자녀에서 MCMs의 위험이 증가될 수 있다(one Class II study).
- 복합요법으로 복용한 VPA는 여성 간질 환자의 자녀에서 MCMs의 위험을 아마도 증가시킬 수 있다(one Class I study).
- CBZ는 여성 간질 환자의 자녀에서 MCMs의 위험을 실질적으로 증가시키지 못할 것이다(one Class I study).
- LTG (one inadequately sensitive Class I study) 나 다른 특정 AEDs (no Class III or better evidence)가 여성 간질 환자의 자녀에서 MCMs의 위험을 증가시키지는지를 판단하기 위한 근거는 불충분하다.

#### 6) 권고

- 임신 첫 3개월 동안 AEDs 복용으로 여성 간질 환자의 자녀에서 MCMs의 위험이 증가할 수 있다는 근거가 있지만, 모든 AEDs 또는 단 한 가지의, 혹은 일부 AEDs로부터 위험이 증가된다고 결정할 수는 없다.
- 가능하다면 MCMs의 위험을 줄이기 위하여 임신 첫 3개월 동안 VPA를 복합요법으로 사용하지 않도록 하여야 한다(Level B).
- 가능하다면 MCMs의 위험을 줄이기 위하여 임신 첫 3개월 동안 단일요법으로 VPA를 사용하지 않도록 고려될 수 있다(Level C).

### 3. 임신 첫 3개월 동안 다른 AEDs와 비교하여 특정 AED에 노출되었을 때 MCMs의 위험이 증가하는가?

2가지의 Class I 연구(OR 2.97, CI 1.65-5.35,<sup>10</sup> OR 2.51, CI 1.43-4.86)<sup>7</sup>에서 VPA 단일요법이 CBZ 단일요법을 사용하였을 때보다 MCMs의 위험이 더 높았다는 것이 밝혀졌다.

한 Class I 연구<sup>10</sup>와 Class II 연구<sup>11</sup>에서 복합요법으로 VPA를 사용하였을 때, VPA가 없는 복합요법에 비하여 위험이 더 높았다(OR 2.49, CI 1.31-4.70,<sup>10</sup> and OR 1.97, CI 0.58-6.66<sup>11</sup>).

한 Class II 연구<sup>12</sup>에서 VPA는 PHT보다 위험이 더 높았다(OR 9.06, CI 1.13-72.14).

우리는 논문의 일차 자료를 이용하여 4가지의 Class III 연구 중 3가지를 비교하였다.<sup>13-15</sup> AEDs

간 비교 중 유의한 결과를 보인 모든 연구를 여기에서 보고하였다. 2가지의 Class III 연구에서,<sup>13,14</sup> VPA는 CBZ(RR 4.34, CI 1.79-10.53,<sup>13</sup> RR 3.83, CI 1.41-10.39)<sup>14</sup>와 LTG(RR 5.58, CI 2.06-15.09,<sup>13</sup> RR 17.04, CI 2.27-128.05)와 개별적으로 비교하였을 때 위험이 더 높았다.<sup>14</sup> 세 번째 Class III 연구<sup>15</sup>에서 VPA는 phenobarbital(PB)보다 더 큰 위험도를 보였다(RR 5.66, CI 1.19-26.88).

4가지의 Class III 연구 모두에서 VPA는 다른 어떠한 단일치료 약물보다도 위험성이 높았다. 우리는 2가지의 연구에서 CBZ, LTG와 PHT와 VPA를 비교하였고, 2가지 연구 모두에서 VPA의 위험이 더 높게 나타났다(RR 5.6, CI 2.42-12.92,<sup>13</sup> RR 4.59, CI 2.07-10.18).<sup>14</sup> 세 번째 Class III 연구에서,<sup>15</sup> PB, CBZ, PHT, primidone과 VPA를 비교하였고, VPA의 위험이 높게 나타났다(RR 3.25, CI 1.27-8.33). 네 번째 Class III 연구에서, 우리는 VPA가 3가지의 이름 모를 AEDs에 비해서도 위험이 높다는 것을 발견하였다(OR 4.0, CI 2.1-7.4).<sup>16</sup>

#### 1) 결론

- 임신 첫 3개월 동안 VPA 단일복용은 CBZ 복용에 비하여 여성 간질 환자의 자녀에게 MCMs가 발생할 가능성이 더 높다(two Class I studies).
- 임신 첫 3개월 동안 VPA 복합요법은 VPA를 포함하지 않는 복합요법에 비하여 여성 간질 환자의 자녀에서 MCMs 발생에 아마도 더 기여한다(one Class I study).
- 임신 첫 3개월 동안 VPA 복용은 PHT에 비하여 여성 간질 환자의 자녀에서 MCMs 발생에 기여할 수 있다(one Class II study).
- 임신 첫 3개월 동안 VPA 복용은 LTG에 비하여 여성 간질 환자의 자녀에서 MCMs 발생에 기여할 수 있다(two Class III studies).

#### 2) 권고

- MCMs 발생 위험을 줄이기 위하여 임신 첫 3개월 동안 VPA는 CBZ와 비교하였을 때 가능하면 사용하지 말아야 한다(Level A).
- MCMs 발생 위험을 줄이기 위하여 임신 첫 3개월 동안 VPA 복합요법은 VPA가 없는 복합요법과 비교하였을 때 가능하면 사용하지 않는다(Level B).
- MCMs 발생 위험을 줄이기 위하여 임신 첫 3개월 동안 PHT나 LTG와 비교하였을 때 VPA를 가능하면 사용하지 않는다(Level C).

4. 임신 첫 3개월 동안 AED 단일요법에 비하여 AED 복합요법에서 MCMs의 위험이 더 증가하는가?

한 Class I 연구<sup>10</sup>에서 단일요법과 복합요법을 비교하였을 때 중등도로 위험이 증가되었다(RR 1.62, CI 1.14~2.31). 3가지의 Class II 연구에서는 (OR 1.76, CI 0.94~3.31<sup>11</sup>; OR 2.00, CI 0.80~3.74<sup>5</sup>; OR 1.46, CI 0.83~2.56)<sup>12</sup> 복합요법으로 위험이 증가되지 않았다. 하지만 이러한 연구들은 실질적 위험의 증가를 배제시킬 수 있을 정도로 충분히 민감하지 않았다.

#### 1) 결론

복합요법은 단일요법에 비하여 여성 간질 환자의 자녀에서 MCMs를 아마도 더 발생시킬 수 있다(one Class I study).

#### 2) 권고

MCMs 발생 위험을 줄이기 위하여, 임신 첫 3개월 동안 가능하면 AED 복합요법을 피할 것을 고려하여야 한다(Level B).

5. 여성 간질 환자의 자녀에서 AED 용량과 MCMs의 발생 위험 간 연관성이 있는가?

모든 연구에서 첫 3개월 동안 AED 용량과 MCMs에 대하여 조사하였다. 한 Class I 연구에서,<sup>10</sup> AED 용량과 MCMs의 발생 위험 간 연관성이 LTG에서 발견되었지만, VPA에서는 그렇지 못하였다. Cochran Armitage method를 사용하여,<sup>17</sup> VPA (exact tests one-sided  $p=0.02$ , two-sided  $p=0.04$ )와 LTG(exact tests one-sided  $p=0.01$ , two-sided  $p=0.02$ )에서 통계적으로 유의한 용량과의 연관성을 발견하였지만, CBZ (exact tests one-sided  $p=0.19$ , two-sided  $p=0.31$ )에서는 발견하지 못하였다. 2가지의 Class II 연구<sup>11,12</sup>와 6가지의 Class III 연구<sup>13-15,18-20</sup>에서 또한 VPA 용량과 MCMs의 연관성을 발견하였다. MCMs의 발생 가능성을 유의하게 높인 VPA의 용량이 일정하지 않았지만, 5개의 연구에서 대략적으로 하루 1,000 mg 이상이었다.<sup>12,13,18-20</sup>

#### 1) 결론

여성 간질 환자의 자녀에서의 MCMs의 발생과 VPA와 LTG의 용량 간 연관성이 존재할 것이다.

#### 2) 권고

MCMs의 발생 위험을 줄이기 위하여 가능한 한 임신 첫 3개월 동안 VPA나 LTG의 용량 제한을 고려하여야 한다.

6. 특정 AEDs와 연관된 특정 MCMs가 존재하는가?

한 Class I 연구<sup>10</sup>에서는 VPA 사용군에서 neural tube defects와 facial clefts의 위험성이 증가한 것으로 나타났다(RR 5.32, CI 1.38~20.50 for neural tube defects and RR 4.18, CI 1.55~11.25 for facial clefts). 한 Class II 연구<sup>5</sup>에서는 PHT 사용군에서 cleft palate의 위험이 증가하고 CBZ 사용군에서 posterior cleft palate의 위험이 증가하는 것으로 나타났다. 또 다른 Class II 연구<sup>12</sup>에서는 VPA에서 neural tube defects와 hypospadias가 증가하는 것으로 나타났다. 2가지의 Class III 연구에서는 VPA에서 spina bifida의 위험이 증가하였고,<sup>9,21</sup> 한 연구에서는 hypospadias의 위험이 증가하였다.<sup>9</sup> 2가지의 Class III 연구<sup>9,15</sup>에서 PB에서 cardiac malformations의 위험이 증가한 것으로 나타났다.

#### 1) 결론

- 자궁 내 PHT의 노출은 cleft palate의 위험을 높일 수 있다(one Class II study).
- 자궁 내 CBZ의 노출은 posterior cleft palate의 위험을 높일 수 있다(one Class II study).
- 자궁 내 VPA의 노출로 인하여 아마도 neural tube defects와 facial cleft의 위험이 높아지고(one Class I study), hypospadias의 위험을 높일 수 있다(one Class II study).
- 자궁 내 PB의 노출은 cardiac malformations의 위험을 높일 수 있다(two Class III studies).

#### 2) 권고

- Neural tube defects와 facial clefts의 위험을 감소시키기 위하여 가능한 한 VPA를 사용하지 않도록 고려하여야 하고(Level B), hypospadias의 위험을 감소시키기 위하여 고려할 수 있다(Level C).
- PHT, CBZ와 PB를 사용하지 않는 것은 가능한 특정 MCMs의 위험을 감소시키기 위하여 고려될 수 있다: PHT-cleft palate, CBZ-posterior cleft palate와 PB-cardiac malformations (Level C).

7. Cognitive teratogenesis.

문헌 고찰로 13가지의 연관 논문을 찾을 수 있었다(table c-6). AAN의 인과관계 근거 분류를 사용하여 이러한 논문을 오류(bias)의 위험에 따라 순서화하였다(appendix c-4A).

결과는 2세 이상의 연령에서 소아 IQ 점수로 측정하였다. 엄마 IQ가 소아 IQ에 중요한 영향을 미

치기 때문에,<sup>22</sup> 엄마 IQ를 제어하지 않은 연구는 순위가 밀려났다. MCM 위험 분석과 달리, 문헌에 의하면 임신 기간 내내 AED 노출에 따른 위험이 존재하기 때문에, 이로 인한 인지기능 저하의 위험은 임신 첫 3개월에만 국한되지 않는다.<sup>23</sup>

8. 자궁 내 AEDs에 노출되지 않은 여성 간질 환자의 자녀에서 인지기능 저하가 나타나는가?

2가지의 Class II 연구<sup>24,25</sup>에서 AEDs에 노출되지 않은 여성 간질 환자의 자녀에서 인지기능이 떨어지지 않는다는 것을 발견하였다. 그 중 한 가지의 연구는 AEDs를 복용하지 않은 여성 간질 환자의 자녀 64명의 IQ와 121명의 대조군을 비교한 맹검 관찰 연구였다.<sup>24</sup> IQ 점수 상 어떠한 유의한 차이도 관찰되지 않았다. 다른 연구<sup>25</sup>에서는 AED를 복용하지 않은 여성 간질 환자의 자녀 57명의 IQ와 연령, 인종과 사회경제적 여건을 일치시킨 57명의 대조군 간 비교에서 어떠한 차이도 발견되지 않았다.

1) 결론

자궁 내 AEDs에 노출되지 않은 여성 간질 환자의 자녀에서 인지기능은 아마도 감소되지 않는다(two Class II studies).

2) 권고

임신 계획 중인 여성 간질 환자와의 상담에서, AEDs를 복용하지 않은 여성 간질 환자의 자녀에서 인지기능이 감소할 위험이 대개는 증가하지 않는다는 것이 고려되어야 한다(Level B).

9. 자궁 내 AEDs에 노출된 여성 간질 환자의 자녀에서 인지기능 저하가 나타나는가?

1) AEDs in general.

2가지의 Class II 연구<sup>26,27</sup>와 한 Class III 연구<sup>28</sup>에서 AEDs를 복용 중인 여성 간질 환자의 자녀에서 인지기능 저하가 관찰되었다. 한 Class II 연구<sup>29</sup>와 Class III 연구<sup>30</sup>에서는 인지기능 저하가 관찰되지 않았다. 연구에서 사용한 결과 변수들은 IQ 검사, development quotient testing 또는 assessment of developmental milestones가 포함되었다. 아마도 다양한 연구 설계와 혼란 변수의 부적절한 제어로 연구 간 차이가 발생한 것으로 생각된다.

2) Carbamazepine.

2가지의 Class II 연구<sup>24,31</sup>와 3가지의 Class III 연구<sup>30,32,33</sup>에서 CBZ는 어떠한 약물에도 노출되지 않은 대조군에 비하여 인지기능 저하의 위험을 증가

시키지 않았다.

3) Valproate.

2가지의 Class II 연구<sup>24,31</sup>에서 VPA는 어떠한 약물에도 노출되지 않은 대조군에 비하여 인지기능 저하의 위험을 증가시켰다.

4) Phenytoin.

한 Class II 연구<sup>34</sup>와 2가지의 Class III 연구<sup>30,33</sup>에서 PHT는 어떠한 약물도 노출되지 않은 대조군에 비하여 인지기능 저하의 위험을 증가시켰다.

5) Phenobarbital.

2가지의 Class III 연구에서 자궁 내 PB 노출된 성인의 코호트(단일 논문에서 분리하여 분석된)에서 정상 성인과 비교하였을 때 인지기능 저하가 관찰되었다.<sup>25</sup>

6) 결론

- 일반적 AEDs를 복용하고 있는 여성 간질 환자의 자녀에서 인지기능 저하의 위험이 증가하는지 결정하기 위한 근거는 불충분하다(conflicting Class II studies).
- CBZ는 아마도 어떠한 약물에도 노출되지 않은 대조군에 비하여 인지기능 저하의 위험을 증가시키지 않았다(two Class II studies).
- VPA는 아마도 어떠한 약물에도 노출되지 않은 대조군에 비하여 인지기능 저하의 위험을 증가시켰다(two Class II studies).
- PHT는 어떠한 약물에도 노출되지 않은 대조군에 비하여 인지기능 저하를 증가시킬 수 있다(one Class II and two Class III studies).
- PB는 어떠한 약물에도 노출되지 않은 대조군에 비하여 여성 간질 환자의 남성 자녀에서 인지기능 저하를 증가시킬 수 있다(two Class III studies).

7) 권고

- CBZ의 노출은 여성 간질 환자의 자녀에서 인지기능 저하를 아마도 일으키지 않는다(Level B).
- 여성 간질 환자의 임신 기간 동안 가능하면 인지기능 저하의 위험을 줄이기 위하여 VPA를 사용하지 않도록 고려하여야 한다(Level B).
- 여성 간질 환자의 임신 기간 동안 가능하면 인지기능 저하의 위험을 줄이기 위하여 PHT를 사용하지 않도록 고려될 수 있다(Level C).
- 여성 간질 환자의 임신 기간 동안 가능하면 인지기능 저하의 위험을 줄이기 위하여 PB를 사용하지 않도록 고려될 수 있다(Level C).

10. 임신 기간 동안 AED 복합요법 사용이 단일 요법에 비하여 인지기능 저하의 위험을 증가시키는가?

3가지의 Class II 연구<sup>24,26,35</sup>에서 AED 복합요법에 노출된 소아들에서 단일요법에 비하여 인지기능 저하가 나타났다. 결과는 IQ, verbal IQ와 Columbia Mental Maturity Scale로 측정하였다.

1) 결론

인지기능은 아마도 자궁 내 AED 단일요법에 비하여 복합요법에 노출된 소아에서 저하된다(three Class II studies).

2) 권고

인지기능 저하의 위험을 줄이기 위하여 임신 기간 동안 AEDs를 복용하고 있는 여성 간질 환자에서 가능한 복합요법 대신 단일요법을 고려하여야 한다(Level B).

11. 자궁 내 특정 AED의 노출이 다른 AEDs에 비하여 인지기능 저하와 연관성이 있는가?

1) Valproate.

2가지의 Class II 연구<sup>24,31</sup>에서는 임신 기간 동안 CBZ에 노출된 소아들과 비교하여 VPA에 노출된 소아에서 인지기능 저하가 나타났다. 한 연구에서, VPA에서 PHT 노출로 인한 위험보다 훨씬 높았다.<sup>31</sup>

2) Other AEDs.

다른 AEDs에 관한 Class III나 그 이상의 연구에 대한 근거는 없었다.

3) 결론

- 임신 기간 중, CBZ에 비하여 VPA에 노출된 소아에서 아마도 인지기능 저하가 나타날 것이다(two Class II studies).
- 임신 기간 중, PHT에 비하여 VPA에 노출된 소아에서 인지기능 저하가 나타날 수 있다(one Class II study).

4) 권고

- 인지기능 저하의 위험을 줄이기 위하여 가능한 한 임신한 여성 간질 환자에서 CBZ에 비하여 VPA를 사용하지 않도록 고려하여야 한다 (Level B).
- 인지기능 저하의 위험을 줄이기 위하여 가능한 한 임신한 여성 간질 환자에서 PHT에 비하여 VPA를 사용하지 않도록 고려할 수 있다 (Level C).

12. Adverse perinatal outcomes.

문헌 검색을 통하여 13가지의 관련 논문을 찾았다(table e-7). AAN의 인과관계 근거 분류를 사용하여 이러한 논문을 오류(bias)의 위험에 따라 순서화하였다(appendix e-4B).

결과 평가 항목에는 1) 제태 연령과 성별을 보정한 후 연구 대상자의 10<sup>th</sup> percentile보다 작은 출생시 몸무게로 정의된, small for gestational age (SGA), 2) 주산기 사망, 3) Apgar scores가 포함되었다.

13. 여성 간질 환자에서 태어난 신생아에서 SGA가 발생할 위험이 있는가?

2가지의 Class II 연구<sup>26,27</sup>에서는 AEDs를 복용 중인 여성 간질 환자의 자녀에서 SGA가 발생할 위험이 증가하였다. 한 Class II 연구에서, AEDs를 복용 중인 여성 간질 환자가 임신하였을 때 SGA 발생 위험이 2배 이상 높았다(n=87) (OR 2.3, CI 1.3~4.0).<sup>26</sup> AEDs를 복용하지 않는 여성 간질 환자가 임신하였을 때 SGA의 위험이 유의하게 증가하지 않았다(OR 1.6, CI 0.9~2.6). 하지만 이러한 연구들은 실질적 위험의 증가를 배제시킬 수 있을 정도로 충분히 민감하지 않았다.

또 다른 Class II 연구<sup>27</sup>에서 AEDs를 복용하고 있는 여성 간질 환자가 임신하였을 때 대조군에 비하여 SGA의 위험이 2배로 높게 나타났다(n=127) (OR 2.16, CI 1.34~3.47, absolute risk 17.3%). 저자들은 AEDs를 복용하지 않는 여성 간질 환자의 자녀에서 SGA의 위험이 증가하지 않았다고 보고하였다.

1) 결론

AEDs를 복용 중인 여성 간질 환자의 신생아에서 아마도 SGA의 발생률이 약 2배였다(two Class II studies).

2) 권고

임신과 연관된 위험도 분류에서 임신 기간 중 AEDs를 복용 중인 여성 간질 환자의 자녀에서 SGA의 위험 증가가 포함되어야 한다. 그리고 임신 기간 중에 여성 간질 환자들의 AED 복용이 자녀에서 발생한 SGA의 감별 진단에 포함되어야 한다 (Level B).

14. 여성 간질 환자의 신생아에서 주산기 사망이 증가할 위험이 있는가?

2가지의 Class II 연구<sup>28,39</sup>에서 주산기 사망의 위

험이 증가하는 어떠한 근거도 발견하지 못하였다 (OR 0.57, CI 0.18~1.77).<sup>39</sup> 이러한 연구들은 실질적 위험의 증가를 배제시킬 수 있을 정도로 충분히 민감하지 않았다.

#### 1) 결론

여성 간질 환자의 신생아에서 실질적으로 주산기 사망이 증가할 위험은 아마도 존재하지 않는다 (two Class II studies).

#### 2) 권고

임신과 연관된 위험도 분류에서 여성 간질 환자의 신생아에서 아마도 실질적으로 주산기 사망 위험이 증가하지 않는다는 것이 포함되어야 한다 (Level B).

### 15. Apgar scores가 여성 간질 환자의 신생아에서 보다 낮을가?

한 Class II 연구<sup>27</sup>에서 AEDs를 복용 중인 간질 환자의 신생아의 1-minute Apgar scores가 7점 미만일 위험이 증가하였다고 보고하였다(n=127) (OR 2.29, CI 1.29~4.05, absolute risk 11.0%). 게다가 이번 연구에서 AEDs를 복용 중인 여성 간질 환자에서 태어난 신생아가 신생아 집중 치료실에 입원할 위험이 증가하였다. AEDs를 복용하지 않는 여성 간질 환자의 신생아에서 이러한 2가지 결과는 증가하지 않았다. 2가지의 Class III 연구<sup>40,41</sup>에서 대조군에 비하여 Apgar scores가 낮았지만, 3가지의 Class III 연구<sup>28,39,42</sup>에서는 이와 같은 결과가 재현되지 않았다. 이러한 Class III 연구 어디에서도 대략적인 비교 위험도를 보고하지 않았다.

#### 1) 결론

AEDs를 복용 중인 여성 간질 환자의 신생아에서 1-minute Apgar scores가 7점 미만일 위험이 약 2배로 증가할 수 있다(one Class II study).

#### 2) 권고

Pregnancy risk stratification에서 임신 중 AEDs를 복용 중인 여성 간질 환자의 자녀에서 1-minute Apgar scores가 7점 미만일 위험의 증가가 반영되어야 한다. 게다가 여성 간질 환자의 임신 기간 중 AED 사용은 신생아에서 1-minute Apgar scores 7점 미만의 감별 진단에 포함될 수 있다(Level C).

Respiratory distress, 자궁 내 성장 제한과 신생아 집중 치료실 입원과 같은 주산기 결과들은 결론을 내리기 위한 자료가 충분하지 않았다.

## CLINICAL CONTEXT

이번 치료 권고안은 AEDs의 임신과 연관된 위험성에 중점을 두었다. 하지만 임신 기간 중 AEDs를 복용하지 않음에 따른 위험성에 대한 평가는 포함되지 않았다. AEDs를 복용함으로써 간질 예방의 장점은 임신하지 않은 환자들에게 분명하고, 이러한 장점이 임신한 환자들에게까지 적용될 수 있으며, 엄마의 간질 발작으로부터 태아의 보호까지 확장될 수 있다. 이번 치료 권고안의 다양한 권고에 따르면 임신 기간 동안 AED 복용을 최소화할 것을 제안하지만, 대부분의 여성 간질 환자에서 AEDs 복용 중단은 합리적이지나 안전한 선택이 되지 않는다. 임신 기간 중 간질의 위험에 대한 연구가 체계적으로 이루어지지 않았지만, AEDs를 중단함으로써 엄마와 태아가 부분 또는 전체 발작에 기인한 물리적 손상에 노출될 수 있다. AEDs 복용 중단 결정에 도움이 될 decision pathways를 이용할 수 있다.<sup>43</sup>

지금까지의 근거에 의하면 출산 가능성이 있는 여성 간질 환자에서 가능한 기형 유발이 적은 약물 조합으로 변경하는 것이 합리적이다. 특히 VPA의 사용은 딜레마이다. VPA는 효과적인 AED이지만,<sup>44</sup> 자궁 내에 노출될 경우 여러 위험과의 연관성을 제시한 자료가 가장 많은 약물이다. VPA를 다른 AED로 바꾸려 한다면, 이를 위하여 임신 전 새로운 치료 약물이 간질 발작을 적절하게 예방하는지 확인하는 것이 현명할 것이다. 임신 기간 중 또 다른 AED로 변경함으로써 알레르기 반응이나 다른 중요한 부작용을 경험할 수도 있고, 복잡요법을 사용하여야 할 수도 있다. 한 환자가 임신한 경우 MCMs는 임신 매우 초기에 발생하기 때문에, 이미 임신 몇 주 동안 복용한 VPA를 변경하는 것이 MCMs의 위험을 줄일 수는 없을 것이다. 인지기능 저하와 연관된 AED 노출 시기 역시 알려져 있지 않기 때문에, 이러한 설명은 AED로 인한 인지기능 저하에도 적용될 수 있다.

많은 AEDs, 특히 새로운 AEDs에서 여러 연구에 포함된 환자들의 수가 너무 적기 때문에 결론을 내리기 어렵고, 이러한 약물들의 기형 유발 여부는 아직 알 수 없는 문제이다.

특정 AED에 노출되어 일부 MCMs가 더 자주 발생한 점은 글로 고찰할 필요가 있다. Neural tube defects 같은 VPA에서 자주 관찰되는 MCMs는 또 다른 AEDs에 노출되었을 때도 나타날 수 있다

는 사실은 특정 AED에 의한 MCMs는 아니라는 것을 시사한다. 다른 기형 유발 물질과 함께, 기형 유발 물질의 범주에 속해 있는 AEDs는 개별 AEDs 간 겹쳐지는 MCMs의 양상을 보이고 있다.

## RECOMMENDATIONS FOR FUTURE RESEARCH

이번 치료 권고안은 일부 질문에 대한 답변이지만, 이러한 임상상황을 보다 어렵게 만들 다른 문제점이 제기되었다. 치료 권고안에서 VPA에 노출될 경우 MCMs의 위험이 증가한 것처럼 보여졌지만, 대부분 AEDs의 절대 위험에 대한 정보는 부족하다. 이러한 점은 특히 새로운 AEDs에 해당되고, 이러한 AEDs 중 일부는 VPA의 대안으로 합리적이다. AED pregnancy registries에 자료 등록이 지속되는 한, 이러한 정보는 곧 밝혀질 것이라는 희망이 있다.

AED의 용량 기형 발생 간 연관성은 모든 AEDs에서 혈중 농도와 함께 명백해질 필요가 있다. 모유 수유를 통한 신생아 시기와 영유아 시기에 단기 간과 오랜 기간 후 AED 노출에 따른 인지기능 저하의 위험이 명백해질 필요가 있는 것처럼, 과거 AEDs와 새로운 AEDs의 자궁 내 노출로 인한 신생아 부작용과 오랜 기간 후 소아에서 나타나는 인지기능 장애와의 연관성은 더욱 명백해질 필요가 있다.

게다가 미래에는 기형 발생을 줄일 수 있는 glutathione reductase, superoxide dismutase, epoxide hydrolase와 other toxin-scavenging mechanisms 같은 대사 체계의 변경에 관한 연구가 시작되어야 한다. 그리고 AEDs와 histone deacetylase와 peroxisome proliferator-activated receptors 같은 직접적인 분자 간 상호작용으로 기형 발생이 유발될 수 있다. 이러한 요인에 대한 심도 깊은 이해를 통하여 AEDs를 복용하고 있는 여성 간질 환자에 대한 개별화된 기형 발생 위험의 평가가 이루어질 수 있을 것이다.<sup>25</sup>

## AUTHORS' AFFILIATIONS

From the University of Miami (C.L.H.), Miami, FL; Emory University (K.J.M., P.B.P.), Atlanta, GA; Columbia University (W.A.H.), New York, NY; Kansas University Medical Center (G.S.G.), Kansas City; New York University School of Medicine (J.A.F.), New York; University of Calgary (S.W.), Alberta, Canada; Centers for Disease Control and Prevention (D.T.), Atlanta, GA; New York Medical College (B.S.K.), New York; Johns Hopkins University (P.W.K.), Baltimore, MD; Harvard Medical School (J.N.R., L.H.), Boston, MA; University of Maryland

(J.H., T.Y.T., A.K.), Baltimore; University of Wisconsin-Madison School of Pharmacy (B.G.); University of Tennessee Health Science Center (C.A.H.), Memphis private practice (A.N.W.), Newport, RI; New York University (B.V.), New York; Texas A&M University Health Science Center (R.F.), Houston; NINDS (D.H.), Bethesda, MD; and University of Pennsylvania (C.L.), Philadelphia.

## ACKNOWLEDGMENT

The authors thank Julia Westerman, Julia Cumming, and Laura Moses for assistance in the preparation of this manuscript.

## DISCLOSURE

The authors report the following conflicts of interest: Dr. Harden has served on the scientific advisory board of Cyberonics, GlaxoSmithKline, UCB Pharma, Valeant, and SK Pharmaceuticals and on the speakers' bureau of GlaxoSmithKline, Pfizer, UCB Pharma, and Abbott. She serves as an editor of *Epilepsy Currents* and receives publishing royalties from Elsevier. Dr. Harden has received research funding from Forest, UCB Pharma, Ortho McNeil, and NIH/NINDS. Dr. Harden sees women with epilepsy in her office practice. Dr. Meador serves as a journal editor for *Neurology*, *Journal of Clinical Neurophysiology*, *Cognitive and Behavioral Neurology*, *Epilepsy & Behavior*, *Epilepsy Currents*, and *Epilepsy.com*. He has received research funding from NIH/NINDS, GlaxoSmithKline, Eisai, Marius, Myriad, Neuropace, SAM Technology, and UCB Pharma. Dr. Meador estimates that 30–40% of his clinical effort is spent on EEGs and the clinical care of patients with epilepsy. Dr. Pennell has served on the Expert Panel for the Keppra Pregnancy Registry sponsored by UCB Pharma. She has received funding for travel from the Northeast Regional Epilepsy Group for speaking at their 2008 Epilepsy Symposium, by the UK Research Council for speaking at the Epilepsy Research UK International Expert Workshop, by UCB Pharma for attending the Executive Panel meeting for the Pregnancy Registry, by the American Epilepsy Society for attending the Board of Directors' Meeting, by the Epilepsy Foundation for attending the Board of Directors' and orientation meetings, by the Long Island Jewish Hospital for lecturing at Neurology Grand Rounds, by Duke University for lecturing at Neurology Grand Rounds, by Brigham and Women's Hospital for lecturing at the Epilepsy Research Conference, by the Milken foundation for attending Pregnancy Registry meetings, and by Massachusetts General Hospital for speaking at the Annual Teratogens Course. She has received honoraria from Journal Watch Neurology for a contributing article, paid for by Massachusetts Medical Society, *NEJM*, for review for the *Lancet Neurology*, the Northeast Regional Epilepsy group for speaking at 2008 Epilepsy Symposium, North Shore Long Island Jewish Health system, Duke University, University of Maryland, the Massachusetts General Hospital for speaking at the post-graduate course in Human Teratogens, and the AAN for speaking and directing annual courses. Dr. Pennell has served as a contributing editor for *Epilepsy Currents* and is on the editorial board of *Epilepsia*. Dr. Pennell has received research support from UCB Pharma, Marius Pharmaceuticals, NIH, NINDS, NIMH, CDC, and Emory University Research Council. Dr. Hauser has served on the scientific advisory board of Ovation and Valeant. He has served on the editorial board of *Acta Neurologica Scandinavica*, *Neuroepidemiology*, and *Epilepsy Research*. He has received honoraria from Cornell University Symposium on epilepsy and acted as a consultant to Pfizer. Dr. Hauser has received research support from AAMC/CDC, NIH/NINDS, FAA, Mayo Clinic, and Hotchkiss Neurological Institute, and has given expert testimony in his role as an FAA consultant. Dr. Gronseth serves as an editor of *Neurology Now* and on the speakers' bureau of Boehringer-Ingelheim. He receives compensation from the AAN for consulting work. Dr. French has served on the scientific advisory board of UCB Pharma, Johnson and Johnson, Eisai, Novartis, Valeant, Icaegen, Intranasal, Sepracor, and Marinus. She has received funding for travel to present findings or give lectures from UCB Pharma, Kyowa, Eisai, Johnson and Johnson, Valeant, and GlaxoSmithKline. She has served as an associate editor for *Epilepsy Currents* and supplement editor for *Epileptic Disorders*. Dr. French is the president of the Epilepsy Study Consortium, which receives money from multiple pharmaceutical companies (including GlaxoSmithKline, UCB Pharma, Johnson and Johnson, Cyberonics, Schwarz Pharma, Ortho McNeil, Eisai, Jazz Pharmaceuticals, Ovation Pharmaceuticals, Endo Pharmaceuticals, Bial Phar-

maceuticals, Neurovista, Valeant Pharmaceuticals, Icaegen, Supemus, Intranasal, SK Pharmaceuticals, Taro Pharmaceuticals, Neurotherapeutics, Sepracor, and Novartis) and she consults on behalf of the consortium. Dr. French has received research funding from Johnson and Johnson, Eisai, UCB Pharma, SK Pharmaceuticals, Valeant, Pfizer, NIH, and Epilepsy Research Foundation. Dr. Wiebe serves on the editorial board of *Neurology*, *Epilepsia*, *Epilepsy & Behavior*, and *Canadian Journal of Neurological Sciences*. Dr. Thurman is an employee of the CDC. Dr. Koppel reports no disclosures. Dr. Kaplan has served on the speakers' bureau of UCB Pharma, GSK, and Ortho McNeil. He serves as an associate editor for *Neurophysiologic Clinique*, *Journal of Clinical Neurophysiology*, and *Epilepsia*. He receives royalties from Demos Publications for the books *Neurological Disease in Women*, *Epilepsy A to Z*, *Imitators of Epilepsy*, and *Nonconvulsive Status Epilepticus*. He has received speaker honoraria from Medical College of South Carolina, Duke University, and Medical College of Virginia, has received research funding from NIH, Schwarz, Ortho McNeil, and Pfizer, and has acted as a consultant for Schering-Plough and Infinite Biological Technologies. Dr. Robinson reports no disclosures. Dr. Hopp receives royalties from UpToDate.com electronic medical journal. She has been on the speakers' bureau of UCB Pharma and GlaxoSmithKline. Dr. Hopp has given testimony in a medico-legal case. Dr. Ting served on the scientific advisory board of UCB Pharma and has received honoraria from the Epilepsy Foundation of America. Dr. Gidal has served on the scientific advisory board for GlaxoSmithKline, UCB Pharma, and Abbott Labs and served as an editor for *Epilepsy & Behavior*, *The Annals of Pharmacotherapy*, and *Pharmacist's Letter*. Dr. Gidal has received research support from UCB Pharma. Dr. Hovings estimates less than 10% of his clinical effort is spent on pharmacology consults. Dr. Wilner has served on the scientific advisory board of and received funding for travel from GlaxoSmithKline. He receives royalties from Demos Publications for *Epilepsy: 199 Answers* and *Epilepsy in Clinical Practice*. He receives board of directors compensation from GlaxoSmithKline. Dr. Vazquez has served on the scientific advisory board of Eisai, UCB, GSK, and Ortho McNeil. She has received honoraria from UCB, GSK, Ortho McNeil, and Eisai. Dr. Vazquez has served on a speakers' bureau for Eisai, GSK, Ortho McNeil, UCB, and Novartis. Dr. Holmes receives research support from Abbott Labs, Eisai, Novartis, Ortho McNeil, and Pfizer. Dr. Krumholz has served on the Department of Transportation Expert Panel on Commercial Drivers and Epilepsy and has served on the editorial board of *The Neurologist* and *Clinical EEG and Neuroscience*. He has received honoraria from the Robert Wood Johnson Medical School for grand rounds. Dr. Finnell has served on the scientific advisory board of the NEAD study at Emory University, the University of Houston Center for Life Sciences Technology, the NIH, and the NIEHS National Advisory Environmental Health Sciences Council. He has received funding for travel from Fundacion BBVA, NIEHS National Advisory Environmental Health Sciences Council, IKMC Steering Committee, European Epilepsy Meeting, NIH, and AES. Dr. Finnell has served as a journal editor for *Birth Defects Research Part A* and holds a patent on folate receptor autoantibody assay. He has received honoraria from McGill University-Montreal Neurological Institute and has received research funding from the Centers for Disease Control and Prevention for the National Birth Defects Prevention Study and the Methodist Hospital Research Institute. Dr. Finnell has given expert testimony, prepared affidavits, and acted as a witness regarding legal proceedings related to the topic of this manuscript. Dr. Hirtz reports no disclosures. Ms. Le Guen reports no disclosures.

#### DISCLAIMER

This statement is provided as an educational service of the American Academy of Neurology. It is based on an assessment of current scientific and clinical information. It is not intended to include all possible proper methods of care for a particular neurologic problem or all legitimate criteria for choosing to use a specific procedure. Neither is it intended to exclude any reasonable alternative methodologies. The AAN recognizes that specific patient care decisions are the prerogative of the patient and the physician caring for the patient, based on all of the circumstances involved. The clinical content section is made available in order to place the evidence-based guideline(s) into perspective with current practice habits and challenges. No formal practice recommendations should be inferred. The findings and conclusions in the report are those of the authors and do not necessarily represent the

official position of the Centers for Disease Control and Prevention.

Received February 2, 2009. Accepted in final form March 23, 2009.

#### REFERENCES

1. United States Department of Health and Human Services, Centers for Disease Control and Prevention, National Center for Health Statistics, Bridged-Race Population Estimates, United States, July 1st resident population by state, county, age, sex, bridged-race, and Hispanic origin on CDC WONDER On-line Database. Available at: <http://wonder.cdc.gov>. Accessed June 2008.
2. Hirtz D, Thurman DJ, Gwinn-Hardy K, et al. How common are the "common" neurologic disorders? *Neurology* 2007;68:326-337.
3. Yerby MS. Quality of life, epilepsy advances, and the evolving role of anticonvulsants in women with epilepsy. *Neurology* 2000;55:S21-S31.
4. Harden CL, Hopp J, Ting TY, et al. Practice Parameter update: management issues for women with epilepsy—focus on pregnancy (an evidence-based review): obstetrical complications and change in seizure frequency: report of the Quality Standards Subcommittee and Therapeutics and Technology Assessment Subcommittee of the American Academy of Neurology and American Epilepsy Society. *Neurology* 2009;73:126-132.
5. Holmes LB, Harvey EA, Coull BA, et al. The teratogenicity of anticonvulsant drugs. *N Engl J Med* 2001;344:1132-1138.
6. Fried S, Kozar E, Nulman I, Einarson TR, Koren G. Malformation rates in children of women with untreated epilepsy. *Drug Safety* 2004;27:197-202.
7. Wide K, Winblad B, Kallen B. Major malformations in infants exposed to antiepileptic drugs in utero, with emphasis on carbamazepine and valproic acid: a nation-wide, population-based register study. *Acta Paediatr* 2004;93:1774-1776.
8. Puhó EH, Szunyogh M, Mernecki J, Czeizel AE. Drug treatment during pregnancy and isolated orofacial clefts in Hungary. *Cleft Palate Craniofac J* 2007;4:194-202.
9. Arpino C, Brescianini S, Robert E, et al. Teratogenic effects of antiepileptic drugs: use of an international database on malformations and drug exposure (MADRE). *Epilepsia* 2006;47:1436-1443.
10. Morrow J, Russell A, Guthrie E, et al. Malformations risks of antiepileptic drugs in pregnancy: a prospective study from the UK Epilepsy and Pregnancy Register. *J Neurol Neurosurg Psychiatry* 2006;77:193-198.
11. Artama M, Auvinen A, Raudaskoski T, Isojarvi I, Isojarvi J. Antiepileptic drug use of women with epilepsy and congenital malformations in offspring. *Neurology* 2005;64:1874-1878.
12. Samrén EB, van Duijn CM, Christiaens GCML, Hofman A, Lindhout E. Antiepileptic drug regimens and major congenital abnormalities in the offspring. *Ann Neurol* 1999;46:739-746.
13. Vajda FJE, Hitchcock A, Graham J, et al. Foetal malformations and seizure control: 52 months data of the Australian Pregnancy Registry. *Eur J Neurol* 2006;13:645-654.
14. Meador KJ, Baker GA, Finnell RH, et al. In utero antiepileptic drug exposure: fetal death and malformations. *Neurology* 2006;67:407-412.
15. Canger R, Battino D, Canevini MP, et al. Malformations in offspring of women with epilepsy: a prospective study. *Epilepsia* 1999;40:1231-1236.

16. Wyszynski WF, Nambisan M, Surve T, Alsdorf RM, Smith CR, Holmes LB. Increased rate of major malformations in offspring exposed to valproate during pregnancy. *Neurology* 2005;64:961-965.
17. Agresti A. *Categorical Data Analysis* (Wiley Series in Probability and Statistics), 2nd edition. Malden, MA: Wiley-Interscience; 2002.
18. Mawer G, Clayton-Smith J, Coyle H, Kini U. Outcome of pregnancy in women attending an outpatient epilepsy clinic: adverse features associated with higher doses of sodium valproate. *Seizure* 2002;11:512-518.
19. Omtzigt JGC, Los FJ, Grobbee DE, et al. The risk of spina bifida aperta after first-trimester exposure to valproate in a prenatal cohort. *Neurology* 1992;42 (suppl 5):119-125.
20. Samrén EB, van Duijn CM, Koch S, et al. Maternal use of antiepileptic drugs and the risk of major congenital malformations: a joint European prospective study of human teratogenesis associated with maternal epilepsy. *Epilepsia* 1997;38:981-990.
21. Bertollini R, Mastroiacovo P, Segni G. Maternal epilepsy and birth defects: a case-control study in the Italian Multi-center Registry of Birth Defects (IPIMC). *Eur J Epidemiol* 1985;1:67-72.
22. Sattler JM. *Assessment of Children* revised/updated. 3rd ed. San Diego: Jerome M. Sattler; 1992.
23. Reinisch JM, Sanders SA, Mortensen EL, Rubin DB. In utero exposure to phenobarbital and intelligence deficits in adult men. *JAMA* 1995;274:1518-1525.
24. Gaily E, Kantola-Sorsa E, Hilesmaa V, et al. Normal intelligence in children with prenatal exposure to carbamazepine. *Neurology* 2004;62:28-32.
25. Holmes LB, Rosenberger PB, Harvey EA, Khoshbin S, Ryan L. Intelligence and physical features of children of women with epilepsy. *Teratology* 2000;61:196-202.
26. Koch S, Titze K, Zimmermann RB, Schröder M, Lehmkuhl U, Rauh H. Long-term neuropsychological consequences of maternal epilepsy and anticonvulsant treatment during pregnancy for school-age children and adolescents. *Epilepsia* 1999;40:1237-1243.
27. Oyen N, Vollset SE, Eide MG, Bjerkedal T, Skjerven R. Maternal epilepsy and offspring's adult intelligence: a population-based study from Norway. *Epilepsia* 2007;48:1731-1738.
28. Hirano T, Fujioka K, Okada M, Iwasa H, Kaneko S. Physical and psychomotor development in the offspring born to mothers with epilepsy. *Epilepsia* 2004;45(suppl 8):53-57.
29. Gaily E, Kantola-Sorsa E, Granström ML. Specific cognitive dysfunction in children with epileptic mothers. *Dev Med Child Neurol* 1990;32:403-414.
30. Wide K, Henning E, Tomson T, Winblad B. Psychomotor development in preschool children exposed to antiepileptic drugs in utero. *Acta Paediatr* 2002;91:409-414.
31. Adab N, Kini U, Vinten J, et al. The longer term outcome of children born to mothers with epilepsy. *J Neurol Neurosurg Psychiatry* 2004;75:1575-1583.
32. Eriksson K, Viinikainen K, Mönkkönen A, et al. Children exposed to valproate in utero: population based evaluation of risks and confounding factors for long-term neurocognitive development. *Epilepsy Res* 2005;65:189-200.
33. Scolnik D, Nulman I, Rovet J, et al. Neurodevelopment of children exposed in utero to phenytoin and carbamazepine monotherapy. *JAMA* 1994;271:767-770.
34. Vanoverloop D, Schnell RR, Harvey EA, Holmes LB. The effects of prenatal exposure to phenytoin and other anticonvulsants on intellectual function at 4 to 8 years of age. *Neurotoxicol Teratol* 1992;14:329-335.
35. Lösche G, Steinhausen HC, Koch S, Helge H. The psychological development of children of epileptic parents: II: the differential impact of intrauterine exposure to anticonvulsant drugs and further influential factors. *Acta Paediatr* 1994;83:961-966.
36. Hvas CL, Henriksen TB, Ostergaard JR, Dam M. Epilepsy and pregnancy: effect of antiepileptic drugs and lifestyle on birth weight. *Br J Obstet Gynaecol* 2000;107:896-902.
37. Viinikainen K, Heinonen S, Eriksson K, Kalviainen R. Community-based, prospective, controlled study of obstetric and neonatal outcome of 179 pregnancies in women with epilepsy. *Epilepsia* 2006;47:186-192.
38. Hilesmaa VK, Bardy A, Teramo K. Obstetric outcome in women with epilepsy. *Am J Obstet Gynecol* 1985;152:499-504.
39. Richmond JR, Krishnamoorthy P, Andermann E, Benjamin A. Epilepsy and pregnancy: an obstetric perspective. *Am J Obstet Gynecol* 2004;190:371-379.
40. Laskowska M, Leszczyńska-Gorzelak B, Oleszczuk J. Pregnancy in women with epilepsy. *Gynecol Obstet Invest* 2001;51:99-102.
