# Supplementary material
Source: PubMed Central journal article supplement (PMC3475194)
Supplement: supp_WNL.0b013e3181a6b312_hardin2.pdf [file supp_WNL.0b013e3181a6b312_hardin2.pdf]

# Uygulama Parametreleri güncellemesi: Epilepsili kadınlara yaklaşım konusu—Gebelik üzerine odaklanma (kanıta dayalı bir gözden geçirme): Teratogenez ve perinatal seyir

Amerikan Nöroloji Akademisi ve Amerikan Epilepsi Derneği'nin Kalite Standartları Alt Komitesi ve Tedavi ve Teknoloji Değerlendirme Alt Komitesi'nin Raporu

C.L. Harden, MD  
K.J. Meador, MD  
P.B. Pennell, MD  
W.A. Hauser, MD  
G.S. Gronseth, MD  
J.A. French, MD  
S. Wiebe, MD  
D. Thurman, MD, MPH  
B.S. Koppel, MD  
P.W. Kaplan, MB, FRCP  
J.N. Robinson, MD  
J. Hopp, MD  
T.Y. Ting, MD  
B. Gidal, PharmD  
C.A. Hovinga, PharmD  
A.N. Wilner, MD  
B. Vazquez, MD  
L. Holmes, MD  
A. Krumholz, MD  
R. Finnell, PhD  
D. Hirtz, MD  
C. Le Guen

Yazışma adresi ve reprint istekleri için American Academy of Neurology, 1080 Montreal Avenue, St. Paul, MN 55116  
guidelines@aan.com

Ek veriler için  
[www.neurology.org](http://www.neurology.org)

Bakınız sayfa 307 ve 323

## ÖZET

**Amaç:** Epilepsili kadınların (EK) gebelik sırasındaki bakımı ile ilgili yaklaşıma ait kanıtları tekrar değerlendirmek.

**Yöntemler:** Ocak 1985 ve Haziran 2007 arasında yayınlanmış ilgili makalelerin sistematik gözden geçirilmesi.

**Bulgular:** İntrauterin ilk trimester valproat (VPA) maruziyetinin karbamazepinle karşılaştırıldığında yüksek olasılıkla, fenitoin ve lamotrijinle karşılaştırıldığında olası daha yüksek önemli konjenital malformasyon (ÖKM) riski vardır. Tedavi edilmemiş EK'lerle karşılaştırıldığında VPA ÖKM gelişimine politerapinin parçası olarak olası ve monoterapi olarak mümkün bir katkıda bulunur. Antiepileptik ilaç (AEI) politerapisinin monoterapi rejimleri ile karşılaştırıldığında ÖKM gelişimi ve düşük kognitif seyir katkısı muhtemeldir. Monoterapi için, intrauterin VPA maruziyeti muhtemelen kognitif seyirleri kötüleştirir. Ayrıca, monoterapi de fenitoin veya fenobarbitale maruziyet olasılıkla kognitif seyirleri kötüleştirir. AEI alan EK'lerin yenidoğanlarında muhtemelen artmış gestasyonel yaş için küçük olma riski vardır ve olasılıkla artmış <7 1 dakikalık Apgar puanı riski taşırlar.

**Öneriler:** Mümkünse, önemli konjenital malformasyon riskini azaltmak için, gebeliğin ilk trimesterinde valproat (VPA) ve antiepileptik ilaç (AEI) politerapisinden sakınılması düşünülmelidir (Düzyey B). Mümkünse, kötü kognitif seyiri önlemek için gebelik süresince VPA ve AEI politerapisinden sakınılması düşünülmelidir (Düzyey C). Gebelik riski tabakalandırması AEI alan epilepsili kadınların çocuklarının artmış gestasyonel yaş için küçük olma riski taşıdığı (Düzyey B) ve olasılıkla artmış <7 1 dakikalık Apgar puanı riski taşıdıklarını (Düzyey C) yansıtmalıdır. *Neurology*® 2009;73:133–141

## SÖZLÜK

**AAN** = Nöroloji Akademisi; **AEI** = antiepileptik ilaç; **CBZ** = karbamazepin; **CI** = güven aralığı; **LTG** = lamotrijin; **ÖKM** = önemli konjenital malformasyon; **OR** = olasılık oranı; **PB** = fenobarbital; **PHT** = fenitoin; **RR** = görece risk; **GYK** = gestasyonel yaş için küçük; **VPA** = valproat; **EK** = epilepsili kadınlar.

ABD'nin nüfusu<sup>1</sup> ve epilepsi prevalansına<sup>2</sup> ait son tahminler yaklaşık yarım milyon epilepsili kadının (EK) doğurgan yaşta olduğunu gösterir. Yine 1000'de 3–5 canlı doğumun EK'lere ait olduğu hesaplanmıştır.<sup>3</sup> Epilepsi tetiklenmemiş, yineleyici nöbetlerin varlığı olarak tanımlanır ve tedavisi tipik

olarak günlük zeminde bir uzun dönem anti-epileptik ilaç (AEI) rejimini gerektirir. Epilepsili kişilerin önemli bir kısmında nöbetler iyi kontrol edilmiştir ve hasta diğer yönlerden de sağlıklıdır, bu nedenle de çocuk doğurmak dahil tüm yaşam deneyimlerine katılma beklentisi vardır.

27 Nisan 2009'da [www.neurology.org](http://www.neurology.org) adresinde elektronik olarak yayımlanmıştır.

Eş zamanlı olarak *Epilepsia* dergisinde de yayınlanmıştır.

Yazarların bağlı oldukları kuruluşlar makalenin sonunda sıralanmıştır.

Kalite Standartları Alt Komitesi (QSS) ve Tedavi ve Teknoloji Değerlendirme (TTA) Alt Komitesi Görev Bildirgesi, Mali İlişki Bildirisi, QSS üyeleri, TTA üyeleri, AAN kanıt sınıflandırması, Önerilerin sınıflandırması (ek e-1 ile e-5) yanı sıra e-1'den e-5'e kadar kaynaklar ve e-1'den e-7'e kadar tablolar [www.neurology.org](http://www.neurology.org) adresindeki *Neurology*® Web sayfasında mevcuttur.

Kalite Standartları Alt Komitesi tarafından 15 Nisan 2008'de ve Tedavi ve Teknoloji Değerlendirme Alt Komitesi tarafından 17 Aralık 2007'de Uygulama Komitesi tarafından 25 Ocak 2009'da ve AAN Yöneticiler Kurulu tarafından 25 Mart 2009'da onaylanmıştır.

Milken Family Foundation tarafından desteklenmiştir.

**Beyan:** Yazarların beyanları makalenin sonunda verilmiştir.

Bu parametre gebe olan veya gebelik planlayan EK'lere klinik yaklaşımda üç önemli konuya ait kanıtları özetler:

1. EK'lerin doğurduğu yenidoğanlarda AEİ'lere intrauterin maruziyetin yarattığı önemli konjenital malformasyon (ÖKM) riski nedir?
2. EK'lerin doğurduğu çocuklarda uzun dönem kognitif yan etki riski nedir?
3. EK'lerin doğurduğu yenidoğanlarda ölüm, düşük doğum ağırlığı ve düşük Apgar puanı riski nedir?

**ANALİTİK SÜRECİN TANIMI** Panel oluşturulması, literatür araştırma stratejisi ve literatürlerin analitik değerlendirilmesi süreci eşlik eden makalede tanımlanmıştır.<sup>4</sup>

**KANITLARIN ANALİZİ** Önemli konjenital malformasyonlar. Literatür araştırmasında 52 ilişkili makale saptandı. Makaleler Amerikan Nöroloji Akademisi'nin (AAN) nedensellik için kanıtların sınıflandırılması (www.neurology.org'daki *Neurology*® Web sayfasındaki ek e-4A) ölçütlerine göre derecelendirildi. Sonuçlara katkısı olan Sınıf III ve daha fazla olarak değerlendirilen çalışmalar e-1'den e-5'e kadar olan tablolarda özetlendi.

ÖKM cerrahi, medikal veya kozmetik önemi olan yapısal anormallik olarak tanımlandı.<sup>5</sup> Fasiyal dismorfizm gibi minör malformasyonlar istatistiksel analize alınmadı. Bu parametrenin amacına yönelik olarak, ÖKM varlığı nesnel bir sonuç kabul edildi. Sınıf I veya II derecesi elde edebilmek için çalışmanın maternal yaş ve sosyoekonomik durum için uyarlanması gerekir.

Kanıtlar kesin olmadığı ve varsa risk az olduğu için maternal epilepsinin ÖKM riskine katkısı burada özgül olarak ele alınmadı.<sup>6</sup> Ancak, maternal epilepsinin yarattığı riskin sıfır olduğu belirtilemez. Bu nedenle, biz sadece AEİ almayan EK'nin kontrol grubu olarak alındığı çalışmaları seçerek ilk trimester sırasında AEİ alınmasının yarattığı ÖKM riski sorusuna yöneldik. Nöbet tipi ve sıklığı açısından maternal epilepsi şiddetinin karşılaştırmalı gruplar arasında tamamen aynı olmadığını ve her iki gruptaki sonlanımlardaki farklılığa katkısı olabileceğini belirtmeliyiz. Diğer nedenlerle AEİ alan epilepsisi olmayan kadınlar çalışmaya alınmadı.

Ardaşık sorular için değerlendirme birbirine kıyasla AEİ'lerin riski veya doz malformasyon ilişkisi gibi tek bir AEİ'ye özgü bulgular üzerinde yoğunlaştırıldı. Böylece bu soruları yanıtlamada kullanılan üç çalışma<sup>7-9</sup> değişik nedenlerle AEİ alan annelerin çocuklarını kapsadı.

AEİ almayan EK'lerin çocukları ile karşılaştırıldığında gebeliğin ilk trimesterinde alınan AEİ'ler EK'lerin çocuklarında ÖKM riskini artırır mı? *Genel olarak AEİ'ler*. Bir Sınıf I çalışma<sup>10</sup> AEİ almayan EK'lerin çocukları ile karşılaştırıldığında AEİ alan EK'lerin çocuklarında artmış bir ÖKM riski saptamamıştır (görece risk [RR] 1.19, güven aralığı [CI] 0.59–2.40). Ancak, çalışma önemli orandaki artmış bir riski dışlayacak duyarlılıkta değildir. İki Sınıf II çalışma (olasılık oranı [OR] 3.92, CI 1.29–11.90<sup>5</sup> ve OR 1.70, CI 1.07–2.68)<sup>11</sup> tedavi almayan kadınlarla karşılaştırıldığında maternal AEİ maruziyeti ile artmış ÖKM riski saptamıştır.

*Valproat*. Bir Sınıf II çalışması<sup>11</sup> monoterapi (OR 4.18, CI 2.31–7.57) veya politerapide (OR 3.54, CI 1.42–8.11) valproat (VPA) kullanan EK'lerin çocuklarında artmış ÖKM riski göstermiştir. Bir Sınıf I çalışma<sup>10</sup> da VPA dahil politerapi ile tedavi almayan EK'lerle karşılaştırıldığında artmış ÖKM riski göstermiştir (RR 2.52, CI 1.17–5.44).

*Karbamazepin*. Bir Sınıf I çalışması<sup>10</sup> karbamazepin (CBZ) alan EK'lerin çocuklarında artmış ÖKM riski bulamamıştır (RR 0.63, CI 0.28–1.41).

*Lamotrijin*. Bir Sınıf I çalışmasında<sup>10</sup> lamotrijin (LTG) alan EK'lerin çocuklarında artmış ÖKM riski gözlenmemiştir (RR 0.92, CI 0.41–2.05), ancak önemli derecedeki artmış riski dışlamak için yetersiz duyarlıktadır.

Her bir AEİ için en az 80 sonucun olduğu en büyük Sınıf I çalışma<sup>10</sup> mutlak risk aşağıdaki gibidir: CBZ (n = 900) %2.2 (CI 1.4–3.4), VPA (n=715) %6.2 (CI 4.6–8.8), LTG (n = 647) %3.2 (CI 2.1–4.9), fenitoin (PHT) (n = 82) %3.7 (CI 1.3–10.2).

#### Sonuçlar

- İlk trimesterde alınan AEİ'ler EK'lerin çocuklarında ÖKM riskini muhtemelen artırır (iki yeterince duyarlı Sınıf II çalışma) ancak artmış riskin tüm AEİ'lerden mi yoksa sadece bir veya birkaç AEİ'den mi kaynaklandığına karar verilemez.
- İlk trimester sırasında VPA monoterapisi EK'lerin çocuklarında ÖKM riskini muhtemelen artırır (bir Sınıf II çalışma).
- Politerapide kullanılan VPA EK'lerin çocuklarında ÖKM riskini muhtemelen artırır (bir Sınıf I çalışma).
- CBZ EK'lerin çocuklarında ÖKM riskini muhtemelen önemli oranda artırmaz (bir Sınıf I çalışma).
- LTG (bir yetersiz duyarlılıkta Sınıf I çalışma) ve diğer spesifik AEİ'lerin (hiçbir Sınıf III veya daha iyi bir kanıtı yok) EK'le-

rin çocuklarında ÖKM riskini artırdığını saptamak için yetersiz kanıt vardır.

#### Öneriler

- EK'lerin çocuklarında ilk trimester sırasında alınan AEI'lerin muhtemelen ÖKM riskini artırdığına dair kanıtlar olmakla birlikte, artmış riskin tüm AEI'lerden mi yoksa sadece bir veya birkaç AEI'den mi kaynaklandığı belirlenemez. Bu nedenle, bu sonuçtan herhangi bir öneri çıkarılamaz.
- Mümkünse, ÖKM riskini azaltmak için gebeliğin ilk trimesterinde politerapinin parçası olarak VPA'dan kaçınılması düşünülebilir (Düzyey B).
- Mümkünse, ÖKM riskini azaltmak için gebeliğin ilk trimesterinde monoterapi olarak VPA'dan kaçınılması düşünülebilir (Düzyey C).

Gebeliğin ilk trimesterinde özgül bir AEI'ye maruziyet diğer AEI'lerle karşılaştırıldığında artmış bir ÖKM riskine eşlik eder mi? İki Sınıf I çalışması (OR 2.97, CI 1.65–5.35<sup>10</sup> ve OR 2.51, CI 1.43–4.86)<sup>7</sup> VPA monoterapisinin CBZ monoterapisinden daha fazla ÖKM riski olduğunu göstermiştir.

Bir Sınıf I çalışma<sup>10</sup> ve bir Sınıf II çalışma<sup>11</sup> politerapinin parçası olarak VPA'nın VPA'nın olmadığı politerapiden daha fazla riskli olduğunu göstermiştir (OR 2.49, CI 1.31–4.70<sup>10</sup> ve OR 1.97, CI 0.58–6.66<sup>11</sup>).

Bir Sınıf II çalışma<sup>12</sup> VPA'nın PHT'den daha riskli olduğunu göstermiştir (OR 9.06, CI 1.13–72.14).

Makalelerdeki primer verileri kullanarak üç Sınıf III çalışmayı karşılaştırdık.<sup>13–15</sup> AEI'ler arasındaki tüm anlamlı karşılaştırmalar burada belirtilmiştir. İki Sınıf III çalışma<sup>13,14</sup> VPA sadece CBZ (RR 4.34, CI 1.79–10.53<sup>13</sup> ve RR 3.83, CI 1.41–10.39)<sup>14</sup> ve LTG (RR 5.58, CI 2.06–15.09<sup>13</sup> ve RR 17.04, CI 2.27–128.05)<sup>14</sup> ile karşılaştırıldığında artmış risk göstermiştir. Üçüncü Sınıf III çalışma<sup>15</sup> VPA ile riskin fenobarbitalden (PB) daha fazla olduğunu göstermiştir (RR 5.66, CI 1.19–26.88).

Dört Sınıf III çalışmanın hepsi VPA ile riskin tüm diğer monoterapi bileşiminden daha fazla olduğunu göstermiştir. İki çalışmada VPA ile CBZ, LTG ve PHT'yi karşılaştırdık ve her ikisinde de artmış risk saptadık (RR 5.6, CI 2.42–12.92<sup>13</sup> ve RR 4.59, CI 2.07–10.18).<sup>14</sup> Üçüncü Sınıf III çalışmada<sup>15</sup> VPA ile PB, CBZ, PHT ve primidonu karşılaştırdık ve artmış risk saptadık (RR 3.25, CI 1.27–8.33). Dördüncü Sınıf III çalışmada üç açıklanmamış AEI ile karşılaştırıldığında VPA ile riskin arttığını saptadık (OR 4.0, CI 2.1–7.4).<sup>16</sup>

#### Sonuçlar

- Gebeliğin ilk trimesterinde VPA monoterapisi CBZ alanlarla karşılaştırıldığında EK'lerin çocuklarında ÖKM gelişimine katkıda bulunma olasılığı yüksektir (iki Sınıf I çalışması).
- VPA içermeyen politerapi ile karşılaştırıldığında gebeliğin ilk döneminde politerapinin parçası olarak VPA kullanımı muhtemelen EK'lerin çocuklarında ÖKM gelişimine katkıda bulunur (bir Sınıf I çalışma).
- Gebeliğin ilk trimesterinde VPA kullanımı PHT kullanımı ile karşılaştırıldığında EK'lerin çocuklarında ÖKM gelişimine olasılıkla katkıda bulunur (bir Sınıf II çalışma).
- Gebeliğin ilk trimesterinde VPA kullanımı LTG kullanımı ile karşılaştırıldığında EK'lerin çocuklarında ÖKM gelişimine olasılıkla katkıda bulunur (iki Sınıf II çalışma).

#### Öneriler

- ÖKM riskini azaltmak için CBZ kullanımı ile karşılaştırıldığında gebeliğin ilk trimesterinde VPA kullanımından mümkünse sakınılmalıdır (Düzyey A).
- ÖKM riskini azaltmak için VPA içermeyen politerapi ile karşılaştırıldığında gebeliğin ilk trimesterinde VPA içeren politerapiden mümkünse kaçınılmalıdır (Düzyey B).
- ÖKM riskini azaltmak için PHT veya LTG kullanımı ile karşılaştırıldığında gebeliğin ilk trimesterinde VPA kullanımından mümkünse kaçınılmalıdır (Düzyey C).

Gebeliğin ilk trimesterinde alınan AEI monoterapisi ile karşılaştırıldığında AEI politerapisi için ÖKM riski daha fazla mıdır? Bir Sınıf I çalışma<sup>10</sup> monoterapiye karşılık politerapi ile orta derecede artmış ÖKM riski göstermiştir (RR 1.62, CI 1.14–2.31). Üç Sınıf II çalışması (OR 1.76, CI 0.94–3.31;<sup>11</sup> OR 2.00, CI 0.80–3.745 ve OR 1.46, CI 0.83–2.56)<sup>12</sup> politerapi ile artmış bir risk göstermemiştir. Ancak, bu çalışmalar anlamlı derecede artmış riski dışlamak için yeterli duyarlılıkta değildir.

**Sonuç.** Monoterapi ile karşılaştırıldığında politerapi muhtemelen EK'lerin çocuklarında ÖKM gelişimine katkıda bulunur (bir Sınıf I çalışma).

**Öneriler.** ÖKM riskini azaltmak için monoterapi ile karşılaştırılınca mümkünse gebeliğin ilk trimesterinde AEI politerapisinden mümkünse kaçınılmalıdır (Düzyey B).

EK'lerin çocuklarında AEI dozu ile ÖKM riski arasında bir ilişki dozu var mıdır? Çalışmaların tümü ilk trimesterde AEI dozu ile ÖKM'yi değerlendirmiştir. Bir Sınıf I çalışmada<sup>10</sup> AEI dozu ile ÖKM riski arasında bir ilişki VPA için değil, ama LTG

için bildirilmiştir. Cochran Armitage yöntemi<sup>17</sup> kullanarak VPA (kesin testler tek yönlü  $p = 0.02$ , iki yönlü  $p = 0.04$ ) ve LTG (kesin testler tek yönlü  $p = 0.01$ , iki yönlü  $p = 0.02$ ) ile anlamlı bir doz ilişkisi saptadık, ancak CBZ (kesin testler tek yönlü  $p = 0.19$ , iki yönlü  $p = 0.31$ ) ile bu izlenmedi. İki Sınıf II çalışma<sup>11,12</sup> ve altı Sınıf III çalışma<sup>13-15,18-20</sup> da VPA dozu ile ÖKM arasında bir ilişki göstermiştir. ÖKM gelişiminin anlamlı derecede olası olduğu yüksek VPA değeri uyumlu değildir, ancak beş çalışmada yaklaşık olarak günlük 1000 mg'dır.<sup>12,13,18-20</sup>

**Sonuç.** EK'lerin çocuklarında VPA ve LTG dozu ile ÖKM gelişme riski arasında muhtemelen bir ilişki vardır (bir Sınıf I çalışma).

**Öneriler.** ÖKM riskini azaltmak için gebeliğin ilk trimesterinde mümkünse VPA veya LTG dozunun azaltılması düşünülmelidir (Düzey B).

**Özgül AEİ'lere bağlı özgül ÖKM'ler var mı? Bir Sınıf I çalışma<sup>10</sup>** VPA ile artmış nöral tüp defektleri ve fasiyal yarık (nöral tüp defektleri için RR 5.32, CI 1.38–20.50 ve fasiyal yarıklar için RR 4.18, CI 1.55–11.25) riski göstermiştir. Bir Sınıf II çalışma<sup>8</sup> PHT ile artmış yarık damak ve CBZ ile artmış posteriyor yarık damak riski göstermiştir. Bir diğer Sınıf II çalışma<sup>12</sup> VPA ile artmış nöral tüp defekti ve hipospadiyas riski göstermiştir. İki Sınıf III çalışma VPA ile artmış spina bifida riski<sup>9,21</sup> ve biri de artmış hipospadiyas riski göstermiştir.<sup>9</sup> İki Sınıf III çalışma<sup>9,15</sup> PB ile artmış kardiyak malformasyon riski göstermiştir.

#### **Sonuçlar**

- İn utero PHT maruziyeti muhtemelen yarık damak riskine katkıda bulunur (bir Sınıf II çalışma).
- İn utero CBZ maruziyeti muhtemelen posteriyor yarık damak riskine katkıda bulunur (bir Sınıf II çalışma).
- İn utero VPA maruziyeti muhtemelen nöral tüp defektleri ve fasiyal yarık riskine (bir Sınıf I çalışması) ve olasılıkla hipospadiyas riskine katkıda bulunur (bir Sınıf II çalışma).
- İn utero PB maruziyeti olasılıkla kardiyak malformasyon riskine katkıda bulunur (iki Sınıf III çalışma).

#### **Öneriler**

- Mümkünse VPA kullanımından kaçınılması nöral tüp defektleri ve fasiyal yarık riskini azaltmak için düşünülmelidir (Düzey B) ve hipospadiyas riskini azaltmak için düşünülebilir (Düzey C).
- Mümkünse PHT, CBZ ve PB kullanımından kaçınılması özgül ÖKM riskini azalt-

mak için düşünülebilir: yarı damak için PHT kullanımı, posteriyor yarık damak için CBZ kullanımı ve kardiyak malformasyonlar için PB kullanımı (Düzey C).

**Kognitif teratogenez.** Literatür araştırmasında 13 ilişkili makale saptanmıştır (tablo e-6). Bunlar hata riski için AAN nedensellik kanıt sınıflandırması şeması kullanılarak (ek e-4A) derecelendirilmiştir.

Sonlanım ölçütü 2 yaş ve sonrasında çocuğun IQ'nun değerlendirilmesidir. Çocuğun IQ'sunda maternal IQ'nun önemli bir etkisi olduğu için<sup>22</sup> maternal IQ'nun kontrol edilmediği çalışmalara daha düşük değer verilmiştir. ÖKM riski analizinin tersine, literatürde öne sürüldüğü gibi<sup>23</sup> maruziyetle ilişkili risk tüm gebelik boyunca olabileceği için AEİ maruziyeti ile ilişkili kognitif risk ilk trimester ile sınırlandırılmamıştır.

**İN utero AEİ'lere maruz kalmayan EK'lerin çocuklarında kognitif seyir kötü müdür? İki Sınıf II çalışma<sup>24,25</sup>** AEİ'ye maruz kalmayan EK'lerin çocuklarında kognisyonun azalmadığı gözlenmiştir. Birisi AEİ almayan EK'lerin 64 çocuğunun IQ'sunu 121 kontrol ile karşılaştıran kör gözlemsel çalışmadır.<sup>24</sup> IQ açısından hiçbir önemli fark saptanmamıştır. Diğer çalışma<sup>25</sup> yaş, ırk ve sosyoekonomik düzey için eşleştirilmiş tedavi almayan EK'nin 57 çocuğu ile 57 kontrol çocuk arasında bir farklılık göstermemiştir.

**Sonuç.** EK'lerin in utero AEİ'ye maruz kalmayan çocuklarında kognisyon muhtemelen azalmamaktadır (iki Sınıf II çalışma).

**Öneri.** Gebelik planlayan EK'lere danışmanlık AEİ almayan EK'lerin çocuklarında muhtemelen artmış düşük kognisyon riski olmadığı belirtilmelidir (Düzey B).

**EK'lerin in utero AEİ'lere maruz kalan çocuklarında kognisyon azalmış mıdır? Genel olarak AEİ'ler.** İki Sınıf II çalışma<sup>26,27</sup> ve bir Sınıf III çalışma<sup>28</sup> AEİ alan EK'lerin çocuklarında düşük kognisyon göstermiştir. Bir Sınıf II çalışma<sup>29</sup> ve bir Sınıf III çalışma<sup>30</sup> herhangi bir düşüklük göstermemiştir. Çalışmalar için sonlanım ölçütleri IQ değerlendirmesi, gelişim bölümü değerlendirmesi veya gelişimsel işaretlerin değerlendirilmesini içermektedir. Çalışmalar arasındaki farklılıklar muhtemelen çalışma desenindeki değişiklikler ve karıştırıcı etkenlerin yetersiz kontrolü nedeniyle.

**Karbamazepin.** İki Sınıf II çalışma<sup>24,31</sup> ve üç Sınıf III çalışma<sup>30,32,33</sup> maruz kalmayan kontrollerle karşılaştırıldığında CBZ'nin kötü kognitif sonlanım riskini artırmadığını göstermiştir.

**Valproat.** İki Sınıf II çalışma<sup>24,31</sup> maruz kalmayan kontrollerle karşılaştırıldığında VPA'nın kö-



tü kognitif sonlanım için artmış risk oluşturduğunu göstermiştir.

**Fenitoin.** Bir Sınıf II çalışma<sup>34</sup> ve iki Sınıf III çalışma<sup>30,33</sup> maruz kalmayan kontrollerle karşılaştırıldığında PHT'nin kötü kognitif sonlanım için artmış risk oluşturduğunu göstermiştir.

**Fenobarbital.** Çalışma grubunu in utero PB'ye maruz kalmış erişkin erkeklerin oluşturduğu iki Sınıf III çalışma (başka bir makalede ayrıca analiz edilmiştir) normal popülasyonla karşılaştırıldığında azalmış kognitif beceri saptamıştır.<sup>23</sup>

#### Sonuçlar

- Genel olarak AEİ alan EK'lerin çocuklarında artmış düşük kognisyon riski olduğuna karar vermek için kanıtlar yetersizdir (çelişkili Sınıf II çalışmalar).
- Maruz kalmayan kontrollerle karşılaştırıldığında CBZ muhtemelen kötü kognitif seyiri artırmaz (iki Sınıf II çalışma).
- Maruz kalmayan kontrollerle karşılaştırıldığında VPA muhtemelen kötü kognitif seyirle birlikte (iki Sınıf II çalışma).
- Maruz kalmayan kontrollerle karşılaştırıldığında PHT olasılıkla kötü kognitif seyirle birlikte (bir Sınıf II ve iki Sınıf III çalışma).
- Maruz kalmayan kontrollerle karşılaştırıldığında PB olasılıkla EK'nin erkek çocuklarında kötü kognitif seyirle birlikte (iki Sınıf III çalışma).

#### Öneriler

- CBZ maruziyeti muhtemelen EK'nin çocuklarında kognitif bozukluğa neden olmaz (Düzey B).
- Kötü kognitif seyir riskini azaltmak için, mümkünse, EK'lerde gebelik sırasında VPA'dan sakınılmalıdır (Düzey B).
- Kötü kognitif seyir riskini azaltmak için, mümkünse, EK'lerde gebelik sırasında PHT'den kaçınmak düşünülebilir (Düzey C).
- Kötü kognitif seyir riskini azaltmak için, mümkünse, EK'lerde gebelik sırasında PB'den kaçınmak düşünülebilir (Düzey C).

Monoterapi ile karşılaştırıldığında gebelik sırasında maruz kalınan AEİ politerapisi artmış kötü kognitif seyir riski oluşturur mu? Üç Sınıf II çalışma<sup>24,26,35</sup> monoterapi ile karşılaştırıldığında AEİ politerapisine maruz kalan çocuklarda kognitif sonlanımın düşük olduğunu göstermiştir. Sonlanım değerlendirmeleri IQ, sözel IQ ve Columbia Mental Olgunluk Ölçeği'ni içermektedir.

**Sonuç.** Monoterapi ile karşılaştırıldığında in utero AEİ politerapisine maruz kalan çocuklarda muhtemelen kognitif sonlanım kötüdür (üç Sınıf II çalışması).

**Öneriler.** Kötü kognitif seyir riskini azaltmak için gebelik sırasında AEİ alan EK'lerde mümkünse politerapi yerine monoterapi düşünülmelidir (Düzey B).

Diğer AEİ'lerle karşılaştırıldığında özgül bir AEİ'ye maruziyet kötü kognitif seyire neden olur mu? **Valproat.** İki Sınıf II çalışması<sup>24,31</sup> gebelikte CBZ'ye maruz kalanlarla karşılaştırıldığında VPA'ya maruz kalan çocuklarda düşük kognitif sonlanım göstermiştir. Çalışmalardan birinde risk PHT ile olandan daha fazladır.<sup>31</sup>

**Diğer AEİ'ler.** Diğer AEİ'lerle ilgili Sınıf III veya daha yüksek derecede herhangi bir kanıt yoktur.

#### Sonuçlar

- CBZ ile karşılaştırıldığında gebelik sırasında VPA'ya maruz kalan çocuklarda kognitif seyir muhtemelen kötüdür (iki Sınıf II çalışması).
- PHT ile karşılaştırıldığında gebelik sırasında VPA'ya maruz kalan çocuklarda kognitif seyir olasılıkla kötüdür (bir Sınıf II çalışması).

#### Öneriler

- Gebe olan EK'lerde, kötü kognitif seyir riskini azaltmak için CBZ ile karşılaştırıldığında mümkünse VPA kullanımından sakınılması düşünülmelidir (Düzey B).
- Gebe olan EK'lerde, kötü kognitif seyir riskini azaltmak için PHT ile karşılaştırıldığında mümkünse VPA kullanımından sakınılması düşünülmelidir (Düzey C).

**Kötü perinatal seyir.** Literatür araştırmasında on üç ilişkili makale saptanmıştır (tablo e-7). Makaleler hata riski için AAN nedensellik kanıt sınıflandırması şeması kullanılarak (ek e-4B) derecelendirilmiştir.

Değerlendirilen sonlanımlar 1) gestasyonel yaş için küçük olma (GYK), gestasyonel yaş ve cinsiyet için kontrol edildiğinde çalışma popülasyonu için doğum ağırlığının 10. persentil altında olması olarak tanımlanmış; 2) perinatal ölüm ve 3) Apgar puanlarıdır.

EK'lerin yenidoğanlarında artmış GYK riski var mıdır? İki Sınıf II çalışma<sup>36,37</sup> AEİ alan kadınların çocuklarında artmış GYK riski göstermiştir. Bir Sınıf II çalışmada, AEİ alan EK'lerin gebeliklerinde GYK sonlanım riski iki katından daha fazladır (n = 87) (OR 2.3, CI 1.3–4.0).<sup>36</sup> AEİ almayan EK'lerin gebeliklerinde anlamlı derecede artmış bir GYK riski gösterilmemiştir (OR 1.6, CI 0.9–2.6). Ancak, çalışma önemli derecede artmış riski dışlamak için yetersiz duyarlıktadır.

Bir diğer Sınıf II çalışması<sup>37</sup> kontrollerle karşılaştırıldığında AEİ alan EK'lerin gebeliklerinde GYK riskinin iki kat olduğunu gözlemişler (n = 127) (OR 2.16, CI 1.34–3.47, mutlak risk %17.3). Yazarlar AEİ almayan EK'lerin çocuklarında artmış GYK riski saptamamışlardır.

**Sonuç.** AEİ alan EK'lerin yenidoğanları muhtemelen beklenen oranlardan iki kat daha fazla artmış GYK riski taşırlar (iki Sınıf II çalışma).

**Öneriler.** Gebelik risk tabakalandırması gebelik sırasında AEİ alan EK'lerin çocuklarında muhtemelen artmış GYK riski olduğunu yansıtmalıdır. Ayrıca, EK'lerin çocuklarında GYK ayırıcı tanısında gebelik sırasında AEİ kullanımı düşünülmelidir (Düzy B).

**EK'lerin yenidoğanlarında perinatal ölüm riski artmış mıdır?** İki Sınıf II çalışmada<sup>38,39</sup> perinatal ölüm riskinde artış gözlenmemiştir (OR 0.57, CI 0.18–1.77).<sup>39</sup> çalışmalar orta derecede artmış bir riski dışlamak için yetersiz duyarlıktadır.

**Sonuç.** EK'lerin doğurduğu yenidoğanlarda muhtemelen önemli derecede artmış bir perinatal ölüm riski yoktur (iki Sınıf II çalışma).

**Öneriler.** Gebelik risk tabakalandırması EK'lerin doğurduğu yenidoğanların muhtemelen önemli derecede artmış bir perinatal ölüm riski taşımadığını yansıtmalıdır (Düzy B).

**EK'lerin yenidoğanlarında Apgar puanları daha mı düşük?** Bir Sınıf II çalışma<sup>37</sup> AEİ alan EK'lerde artmış <7 1 dakikalık Apgar puanı riski göstermiştir (n = 127) (OR 2.29, CI 1.29–4.05, mutlak risk %11.0). Ayrıca, bu çalışma AEİ alan EK'lerin doğurduğu yenidoğanlarda artmış neonatal yoğun bakım ünitesine yatırılma oranı göstermiştir. Bu iki sonlanım AEİ almayan EK'lerin çocuklarında artmamıştır. İki Sınıf III çalışma<sup>40,e1</sup> kontrollerle karşılaştırıldığında düşük Apgar puanı göstermiştir ve üç Sınıf III çalışmada<sup>38,39,e2</sup> bu saptanmamıştır. Bildirilen Sınıf III çalışmaların hiçbirini karşılaştırmalı risk tahminlerine göstermez.

**Sonuç.** AEİ alan kadınların yenidoğanları olasılıkla beklenen oranlardan iki kat daha fazla artmış <7 1 dakikalık Apgar puanı riski taşırlar (bir Sınıf II çalışma).

**Öneriler.** Gebelik risk tabakalandırması gebelik sırasında AEİ kullanan EK'lerin çocuklarının olasılıkla artmış <7 1 dakikalık Apgar puanı riski taşıdıklarını yansıtmalıdır. Ayrıca, <7 1 dakikalık Apgar puanı olan çocukların ayırıcı tanısında EK'lerin gebelik sırasında AEİ kullanımı düşünülebilir (Düzy C).

Respiratuvar distres, intrauterin gelişme geriliği ve neonatal yoğun bakım ünitesine yatış gibi diğer perinatal sonlanımlar için karar verdirecek yeterli veri yoktur.

**KLİNİK İÇERİK** Bu parametre AEİ'ların gebelik ile ilişkili riskleri üzerinde yoğunlaşır. Ancak, gebelik sırasında AEİ kullanılmamasının risklerini ele almaz. AEİ kullanımının nöbet önlemedeki faydaları gebe olmayan kadınlarda kesindir ve bu faydalar gebe hastalar için de geçerlidir ve maternal nöbetlerden fütüsün korunmasını da kapsar. Bu parametredeki önerilerin çoğu gebelik sırasında AEİ maruziyetinin azaltılmasını önermekle birlikte çoğu EK için AEİ'lerin kesilmesi mantıklı veya güvenli bir seçenek değildir. Gebelik sırasında nöbet riski sistematik olarak incelenmemiş olmakla birlikte AEİ'lerin kesilmesi anne ve fütüsü parsiyel veya jeneralize nöbetlerden kaynaklanabilecek kazalarda fiziksel yaralanmaya açık hale getirir. AEİ'lerin ne zaman kesileceğine karar vermeğe yardımcı olacak karar yöntemleri mevcuttur.<sup>e3</sup>

Gözden geçirilen kanıtlara dayanarak, mümkün olduğunda çocuk doğurma potansiyeli olan EK'lerde daha az teratojenik bir rejime geçilmesi mantıklı görünmektedir. VPA etkin bir AEİ olmakla birlikte<sup>e4</sup> in utero maruziyetle risk birlikteliğine dair en fazla sayıda verinin olduğu ilaç olarak öne çıkmaktadır. VPA'dan başka bir AEİ'ye geçilmesi planlanıyorsa yeni tedavinin nöbetleri yeterince engellediğinden emin olmak için bunun gebelik öncesinde yapılması akıllıca görünmektedir. Gebelik sırasında başka bir AEİ'ye geçilmesi alerji, diğer ciddi yan etkiler ve politerapi maruziyeti riskleri oluşturur. Hasta gebe ise gestasyonel birkaç hafta içinde AEİ'yi değiştirmek ÖKM riskini ortadan kaldırmayacaktır, çünkü bu fenomen gebeliğin çok erken döneminde gerçekleşir. Bu kognitif yan etkinin maruziyetin zamanı ile ilişkisi bilinmediği için kognitif teratogenez için de geçerlidir.

Birçok AEİ, özellikle de daha yeni olanlar, için sonuca varmak için çalışmalardaki hasta sayısı çok azdı ve bu ilaçların teratojenitesi bilinmemektedir.

Bazı ÖKM'lerin özgül AEİ'lere maruziyetle daha sık geliştiği bulgusu bu bağlamda değerlendirilmelidir. Nöral tüp defektleri gibi VPA ile daha sık gözlenen ÖKM'ler diğer AEİ'lere maruziyetle de gelişebilir; bu da bunun AEİ'ye özgül bir ÖKM olmadığını gösterir. Diğer teratojenler gibi, teratojenik bir kategori olarak AEİ'ler tek tek AEİ'ler arasında örtüşen şekilde bir ÖKM'ye neden olur.

**İLERİDEKİ ARAŞTIRMALAR İÇİN ÖNERİLER** Bu parametre bazı soruları yanıtladığıyla birlikte, klinik tabloları daha da karmaşıklaştıran başka soruları ortaya çıkarır. Bu parametre VPA

maruziyeti ile artmış ÖKM riski gösterir, ancak birçok diğer AEİ'nin mutlak riski hakkında özgül bilgiler yetersizdir. Bu özellikle VPA'ya rasyonel bir alternatif olarak tercih edilebilecek birkaç yeni AEİ için geçerlidir. AEİ gebelik kayıtlarına devam eden veri girişleriyle bu bilginin bir süre sonra ortaya çıkacağı ümit edilmektedir.

Serum düzeyleriyle de birleştirilerek tüm AEİ'ler için AEİ dozu-malformasyon ilişkisi varlığının aydınlatılması gerekir. Hem eski hem yeni AEİ'ler için in utero AEİ'ye maruz kalan çocuklarda kötü neonatal sonlanım ve uzun dönem kognitif seyrin daha da aydınlatılması gerekmektedir, bu neonatal ve emzirme sürecindeki infantil dönemde AEİ'ye maruziyetin kısa dönem ve uzun dönem kognitif riskleri için de geçerlidir.

Ek olarak, glutatyon redüktaz, superoksit dismutaz, epoksit hidrolaz ve diğer toksik uzaklaştırıcı mekanizmalar gibi modifikasyonu teratojenik riski azaltacak metabolik sistemleri değerlendirecek ileri araştırmalar başlatılmalıdır. Ayrıca, AEİ'ler arasındaki etkileşimler ve histon deasetilaz ve peroksizom proliferatör aktive reseptörler gibi moleküler hedeflerin teratogenezde bir rolü olabilir. Bu faktörlerin daha iyi anlaşılması sonuçta AEİ alan EK'lerde kişisel teratojenik riskin değerlendirilebilmesine olanak sağlayabilir.<sup>65</sup>

## YAZARLARIN BAĞLI BULUNDUKLARI

### KURULUŞLAR

Miami üniversitesi (C.L.H.), Miami, FL; Emory Üniversitesi (K.J.M., P.B.P.), Atlanta, GA; Columbia Üniversitesi (W.A.H.), New York, NY; Kansas Üniversitesi Tıp Merkezi (G.S.G.), Kansas City; New York Üniversitesi Tıp Okulu (J.A.F.), New York; Calgary Üniversitesi (S.W.), Alberta, Kanada; Hastalık Kontrolü ve Önlenmesi Merkezi (D.T.), Atlanta, GA; New York Tıp Koleji (B.S.K.), New York; Johns Hopkins Üniversitesi (P.W.K.), Baltimore, MD; Harvard Tıp Okulu (J.N.R., L.H.), Boston, MA; Maryland Üniversitesi (J.H., T.Y.T., A.K.), Baltimore; Wisconsin-Madison Üniversitesi Eczacılık Okulu (B.G.); Tennessee Üniversitesi Sağlık Bilimleri Merkezi (C.A.H.), Memphis; özel çalışıyor (A.N.W.), Newport, RI; New York Üniversitesi (B.V.), New York; Texas A&M Üniversitesi Sağlık Bilimleri Merkezi (R.F.), Houston; NINDS (D.H.), Bethesda, MD ve Pennsylvania Üniversitesi (C.L.), Philadelphia.

### TEŞEKKÜRLER

Yazarlar yazının hazırlanmasındaki yardımcıları için Julia Westerman, Julia Cumming ve Laura Moses'e teşekkür eder.

### BEYAN

Yazarlar aşağıdaki ilişkileri bildirir: Dr. Harden Cyberonics, GlaxoSmithKline, UCB Pharma, Valeant ve SK Pharmaceuticals'ın bilimsel danışma kurulunda ve GlaxoSmithKline, Pfizer, UCB Pharma ve Abbott'un konuşmacı bürosunda çalışmıştır. *Epilepsy Currents*'da editör olarak çalışmaktadır ve Elsevier'den telif ücreti alır. Dr. Harden Forest, UCB Pharma, Ortho McNeil ve NIH/NINDS'den araştırma bursu almıştır. Dr. Harden kendi muayenesinde epilepsili kadınları görür. Dr. Meador *Neurology*, *Journal of Clinical Neurophysiology*, *Cognitive and Behavioral Neurology*, *Epilepsy & Behavior*, *Epilepsy Currents* ve *Epilepsy.com*'da dergi editörü olarak çalışır. NIH/NINDS, GlaxoSmithKline, Eisai, Marius, Myriad, Neopace, SAM Technology ve UCB Pharma'dan araştırma fonu almıştır. Dr. Meador klinik çalışmalarının %30-40'ını EEG ve epilepsili hastaların bakımının oluşturduğunu tahmin etmektedir. Dr. Pennell UCB Pharma tarafından desteklenen Keppra Gebelik Kaydı İçin Uzman Paneli'nde çalışmıştır. Northeast Regional Epilepsy Group'undan 2008 Epilepsi Sempozyumunda konuşmak için seyahat bursu ve UK Research Council'den Epilepsy Research UK International Expert

Workshop'ta konuşmak için, UCB Pharma'dan Gebelik Kaydı için Executive panel toplantısına katıldığı için, American Epilepsy Society'den Board of Directors' Meeting'e katıldığı için, Epilepsy Foundation'den Board of Directors' ve oryantasyon toplantılarına katıldığı için, Long Island Jewish Hospital'den Neurology Grand Rounds'larda ders verdiği için, Duke Üniversitesinden Neurology Grand Rounds'larda ders verdiği için, Brigham and Women's hastanesi'nden Epilepsi Araştırma Konferansı'nda ders verdiği için, Milken kurumundan Gebelik Kayıt toplantılarına katıldığı için ve Massachusetts Genel Hastanesi'nden Yıllık Teratojenler Kursu'nda konuştuğu için burs almıştır. Bir makaleye katkısından dolayı *Journal Watch Neurology*'den ücret almıştır; Massachusetts Medical Society, *NEJM*, *Lancet Neurology*'de hakemlik, Northeast Bölgesel Epilepsi grubundan 2008 Epilepsi Sempozyumu'nda konuşması için, North Shore Long Island Jewish Health sistemi, Duke Üniversitesi, Maryland Üniversitesi, İnsan Teratojenleri'nde verdiği mezuniyet sonrası ders için Massachusetts Genel Hastanesi'nden ve yıllık dersleri idaresi ve konuşmaları için AAN'den ücret almıştır. Dr. Pennell *Epilepsy Currents*'da editörlük yapmıştır ve *Epilepsia* dergisinin editörler kurulundadır. Dr. Pennell UCB Pharma, Marinus Pharmaceuticals, NIH, NINDS, NIMH, CDC ve Emory Üniversitesi Araştırma Konseyi'nden araştırma desteği almıştır. Dr. Hauser Ovation ve Valeant'ın bilimsel danışma kurulunda çalışmıştır. *Acta Neurologica Scandinavia*, *Neuroepidemiology* ve *Epilepsy Research* dergilerinin editörler kurulunda çalışmıştır. Epilepsi hakkında Cornell Üniversitesi Sempozyumu'nda hizmet ücreti almıştır ve Pfizer'da danışman olarak çalışmıştır. Dr. Hauser AAMC/CDC, NIH/NINDS, FAA, Mayo Clinic ve Hotchkiss Nöroloji Enstitüsü'nden araştırma desteği almış ve FAA'daki danışmanlık rolü için bilişkişi şahitliği vermiştir. Dr. Gronseth *Neurology Now* dergisinde editör olarak ve Boehringer-Ingelheim konuşmacı bürosunda hizmet vermektedir. Danışmanlık işleri için AAN'den ücret almaktadır. Dr. French UCB Pharma, Johnson and Johnson, Eisai, Novartis, Valeant, Icagen, Intranasal, Sepracor ve Marinus'un bilimsel danışma kurulunda çalışmıştır. Bulgularını sunmak veya ders vermek için UCB Pharma, Kyowa, Eisai, Johnson and Johnson, Valeant ve GlaxoSmithKline'dan seyahat bursu almıştır. *Epilepsy Currents* dergisinde yardımcı editör ve *Epileptic Disorders* dergisinde ek editörü olarak çalışmıştır. Dr. French birçok ilaç şirketinden (GlaxoSmithKline, UCB Pharma, Johnson and Johnson, Cyberonics, Schwarz Pharma, Ortho McNeil, Eisai, Jazz Pharmaceuticals, Ovation Pharmaceuticals, Endo Pharmaceuticals, Bial Pharmaceuticals, Neurovista, Valeant Pharmaceuticals, Icagen, Supernus, Intranasal, SK Pharmaceuticals, Taro Pharmaceuticals, Neurotherapeutics, Sepracor ve Novartis gibi) para alan Epilepsi çalışma Konsorsiyumu'nun başkanıdır ve konsorsiyum yararına danışmanlık yapar. Dr. French Johnson and Johnson, Eisai, UCB Pharma, SK Pharmaceuticals, Valeant, Pfizer, NIH ve Epilepsi Araştırma Kuruluşu'ndan araştırma fonu almıştır. Dr. Wiebe *Neurology*, *Epilepsia*, *Epilepsy & Behavior* ve *Canadian Journal of Neurological Sciences* dergilerinin editörler kurulunda hizmet vermektedir. Dr. Thurman CDC'nin bir çalışanıdır. Dr. Koppel'in bir beyanı yoktur. Dr. Kaplan UCB Pharma, GSK ve Ortho McNeil'in konuşmacı bürosunda çalışmıştır. *Neurophysiologie Clinique*, *Journal of Clinical Neurophysiology* ve *Epilepsia* dergilerinde yardımcı editör olarak çalışır. *Neurological Disease in Women*, *Epilepsy A to Z*, *Imitators of Epilepsy* ve *Nonconvulsive Status Epilepticus* kitapları için Demos Publications'den ücret alır. South Carolina Tıp Koleji, Duke Üniversitesi ve Virginia Tıp Kolejinden konuşmacı ücreti ve NIH, Schwarz, Ortho McNeil ve Pfizer'dan araştırma desteği almıştır, Schering-Plough ve Infinite Biological Technologies'de danışmanlık yapar. Dr. Robinson'un bir beyanı yoktur. Dr. Hopp elektronik tıp dergisi UpToDate.com'dan hizmet bedeli almaktadır. UCB Pharma ve GlaxoSmithKline'in konuşmacı bürosunda bulunmuştur. Dr. Hopp mediko-legal olgularda şahitlik yapmıştır. Dr. Ting UCB Pharma'nın bilimsel danışma kurulunda çalışmıştır ve Epilepsy Foundation of America'dan hizmet bedeli almıştır. Dr. Gidal GlaxoSmithKline, UCB Pharma ve Abbott Labs'ın bilimsel danışma kurulunda çalışmıştır ve *Epilepsy & Behavior*, *Annals of Pharmacotherapy* ve *Pharmacist's Letter* dergilerinin editörlüğünü yapmıştır. Dr. Gidal UCB Pharma'dan araştırma desteği almıştır. Dr. Hovinga klinik zamanının %10'dan azını farmakoloji konsültasyonları için harcadığını tahmin etmektedir. Dr. Wilner GlaxoSmithKline'in bilimsel danışma kurulunda yer almış ve buradan seyahat desteği almıştır. *Epilepsy: 199 Answers* and *Epilepsy in Clinical Practice* için Demos Publications'den ücret almaktadır. GlaxoSmithKline'dan yöneticiler kuruldu ücreti almaktadır. Dr. Vazquez Eisai, UCB, GSK ve Ortho McNeil'in bilimsel danışma kurulunda çalışmıştır. UCB, GSK, Ortho McNeil ve Eisai'den hizmet bedeli almıştır. Dr. Vazquez Eisai, GSK, Ortho McNeil, UCB ve Novartis'in konuşmacı bürosunda çalışmıştır. Dr. Holmes Abbott Labs, Eisai, Novartis, Ortho McNeil ve Pfizer'dan araştırma desteği almaktadır. Dr. Krumholz Department of Transportation Expert Panel on Commercial Drivers and Epilepsy'de hizmet vermiştir ve *The Neurologist* ve *Clinical EEG and Neuroscience* dergilerinin editörler kuru-

lunda yer almıştır. Büyük vizitler Robert Wood Johnson Medical Schoof'dan ücret almıştır. Dr. Finnell Emory Üniversitesi NEAD çalışması bilimsel danışma kurulu, Houston Üniversitesi Yaşam Bilimleri Teknolojisi Merkezi, NIH ve NIEHS Ulusal Çevresel Sağlık Bilimleri Danışma Konseyi'nde çalışmıştır. Seyahat için Fundacion BBVA, NIEHS Ulusal Çevresel Sağlık Bilimleri Danışma Konseyi, IKMC İdari Komitesi, Avrupa Epilepsi Toplantısı, NIH ve AES'den seyahat bursu almıştır. Dr. Finnell *Birth Defects Research Part A*'da dergi editörü olarak çalışmıştır ve folat reseptör otoantikörlerinin değerlendirilmesine yönelik bir patenti vardır. McGill University-Montreal Nöroloji Enstitüsü'nden ücret almıştır ve Ulusal Doğum Defektlerini Önleme Çalışması için Hastalık Kontrolü ve Önlenmesi Merkezi'nden ve Methodist Hastanesi Araştırma Enstitüsü'nden araştırma bursu almıştır. Dr. Finnell bu makalenin konusu ile ilgili yasal süreçlerle ilgili olarak bilirkişi tanıklığı yapmış, beyanname hazırlamış ve şahitlik yapmıştır. Dr. Hirtz'in bir beyanı yoktur. Ms. Le Guen'in bir beyanı yoktur.

#### AÇIKLAMA

Bu bildiri Amerikan Nöroloji Akademisi'nin bir eğitim hizmeti olarak sunulmuştur. Güncel bilimsel ve klinik verilerin değerlendirilmesine dayanır. Özel bir nörolojik problemin ele alınmasında tüm olası uygun yöntemleri içermesi veya özgül bir işlemin kullanımında seçilecek tüm uygun ölçütleri içermesi niyetlenmemiştir. Herhangi bir rasyonel alternatif metodolojiyi dışlamak niyetinde değildir. AAN hasta bakım kararlarının içinde bulunulan durumun özelliklerine göre hasta ve hastayla ilgilenen hekimin ayrıcalığı olduğunu kabul eder. Klinik içerik bölümü kanıta dayalı rehber(ler)in mevcut uygulama alışkanlıkları ve zorlukları bağlamında uygun yere yerleştirmek için sunulmuştur. Buradan formal bir uygulama önerisi çıkarılmamalıdır. Bu yazıdaki bulgu ve sonuçlar yazarlara aittir ve Hastalık Kontrolü ve Önleme Merkezi'nin resmi duruşunu yansıtmaz.

2 Şubat 2009'da alındı. Son haliyle 23 Mart 2009'da yayına kabul edildi.

#### KAYNAKLAR

1. United States Department of Health and Human Services, Centers for Disease Control and Prevention, National Center for Health Statistics, Bridged-Race Population Estimates, United States. July 1st resident population by state, county, age, sex, bridged-race, and Hispanic origin on CDC WONDER On-line Database. Available at: <http://wonder.cdc.gov>. Accessed June 2008.
2. Hirtz D, Thurman DJ, Gwinn-Hardy K, et al. How common are the "common" neurologic disorders? *Neurology* 2007;68:326–337.
3. Yerby MS. Quality of life, epilepsy advances, and the evolving role of anticonvulsants in women with epilepsy. *Neurology* 2000;55:S21–S31.
4. Harden CL, Hopp J, Ting TY, et al. Practice Parameter update: management issues for women with epilepsy—focus on pregnancy (an evidence-based review): obstetrical complications and change in seizure frequency: report of the Quality Standards Subcommittee and Therapeutics and Technology Assessment Subcommittee of the American Academy of Neurology and American Epilepsy Society. *Neurology* 2009;73:126–132.
5. Holmes LB, Harvey EA, Coull BA, et al. The teratogenicity of anticonvulsant drugs. *N Engl J Med* 2001;344:1132–1138.
6. Fried S, Kozar E, Nulman I, Einarson TR, Koren G. Malformation rates in children of women with untreated epilepsy. *Drug Safety* 2004;27:197–202.
7. Wide K, Winbladh B, Kallen B. Major malformations in infants exposed to antiepileptic drugs in utero, with emphasis on carbamazepine and valproic acid: a nation-wide, population-based register study. *Acta Paediatr* 2004;93:1774–1776.

8. Puho EH, Szunyogh M, Metneki J, Czeizel AE. Drug treatment during pregnancy and isolated orofacial clefts in Hungary. *Cleft Palate Craniofac J* 2007;4:194–202.
9. Arpino C, Brescianini S, Robert E, et al. Teratogenic effects of antiepileptic drugs: use of an international database on malformations and drug exposure (MADRE). *Epilepsia* 2000;41:1436–1443.
10. Morrow J, Russell A, Guthrie E, et al. Malformations risks of antiepileptic drugs in pregnancy: a prospective study from the UK Epilepsy and Pregnancy Register. *J Neurol Neurosurg Psychiatry* 2006;77:193–198.
11. Artama M, Auvinen A, Raudaskoski T, Isojarvi I, Isojarvi J. Antiepileptic drug use of women with epilepsy and congenital malformations in offspring. *Neurology* 2005;64:1874–1878.
12. Samrén EB, van Duijn CM, Christiaens GCML, Hofman A, Lindhout E. Antiepileptic drug regimens and major congenital abnormalities in the offspring. *Ann Neurol* 1999;46:739–746.
13. Vajda FJE, Hitchcock A, Graham J, et al. Foetal malformations and seizure control: 52 months data of the Australian Pregnancy Registry. *Eur J Neurol* 2006;13:645–654.
14. Meador KJ, Baker GA, Finnell RH, et al. In utero antiepileptic drug exposure: fetal death and malformations. *Neurology* 2006;67:407–412.
15. Canger R, Battino D, Canevini MP, et al. Malformations in offspring of women with epilepsy: a prospective study. *Epilepsia* 1999;40:1231–1236.
16. Wyszynski WF, Nambisan M, Surve T, Alsdorf RM, Smith CR, Holmes LB. Increased rate of major malformations in offspring exposed to valproate during pregnancy. *Neurology* 2005;64:961–965.
17. Agresti A. *Categorical Data Analysis* (Wiley Series in Probability and Statistics), 2nd edition. Malden, MA: Wiley-Interscience; 2002.
18. Mawer G, Clayton-Smith J, Coyle H, Kini U. Outcome of pregnancy in women attending an outpatient epilepsy clinic: adverse features associated with higher doses of sodium valproate. *Seizure* 2002;11:512–518.
19. Omtzigt JGC, Los FJ, Grobbee DE, et al. The risk of spina bifida aperta after first-trimester exposure to valproate in a prenatal cohort. *Neurology* 1992;42 (suppl 5):119–125.
20. Samrén EB, van Duijn CM, Koch S, et al. Maternal use of antiepileptic drugs and the risk of major congenital malformations: a joint European prospective study of human teratogenesis associated with maternal epilepsy. *Epilepsia* 1997;38:981–990.
21. Bertollini R, Mastoiacovo P, Segni G. Maternal epilepsy and birth defects: a case-control study in the Italian Multi-center Registry of Birth Defects (IPIMC). *Eur J Epidemiol* 1985;1:67–72.
22. Sattler JM. *Assessment of Children* revised/updated. 3rd ed. San Diego: Jerome M. Sattler; 1992.
23. Reinisch JM, Sanders SA, Mortensen EL, Rubin DB. In utero exposure to phenobarbital and intelligence deficits in adult men. *JAMA* 1995;274:1518–1525.
24. Gaily E, Kantola-Sorsa E, Hiilesmaa V, et al. Normal intelligence in children with prenatal exposure to carbamazepine. *Neurology* 2004;62:28–32.
25. Holmes LB, Rosenberger PB, Harvey EA, Khoshbin S, Ryan L. Intelligence and physical features of children of women with epilepsy. *Teratology* 2000;61:196–202.
26. Koch S, Titze K, Zimmermann RB, Schröder M, Lehmkuhl U, Rauh H. Long-term neuropsychological consequences of maternal epilepsy and anticonvulsant



- treatment during pregnancy for school-age children and adolescents. *Epilepsia* 1999;40:1237–1243.
27. Oyen N, Vollset SE, Eide MG, Bjerkedal T, Skjærven R. Maternal epilepsy and offspring's adult intelligence: a population-based study from Norway. *Epilepsia* 2007;48:1731–1738.
  28. Hirano T, Fujioka K, Okada M, Iwasa H, Kaneko S. Physical and psychomotor development in the offspring born to mothers with epilepsy. *Epilepsia* 2004;45(suppl 8):53–57.
  29. Gaily E, Kantola-Sorsa E, Granström ML. Specific cognitive dysfunction in children with epileptic mothers. *Dev Med Child Neurol* 1990;32:403–414.
  30. Wide K, Henning E, Tomson T, Winbladh B. Psychomotor development in preschool children exposed to antiepileptic drugs in utero. *Acta Paediatr* 2002;91:409–414.
  31. Adab N, Kini U, Vinten J, et al. The longer term outcome of children born to mothers with epilepsy. *J Neurol Neurosurg Psychiatry* 2004;75:1575–1583.
  32. Eriksson K, Viinikainen K, Mönkkönen A, et al. Children exposed to valproate in utero: population based evaluation of risks and confounding factors for long-term neurocognitive development. *Epilepsy Res* 2005;65:189–200.
  33. Scolnik D, Nulman I, Rovet J, et al. Neurodevelopment of children exposed in utero to phenytoin and carbamazepine monotherapy. *JAMA* 1994;271:767–770.
  34. Vanoverloop D, Schnell RR, Harvey EA, Holmes LB. The effects of prenatal exposure to phenytoin and other anti-convulsants on intellectual function at 4 to 8 years of age. *Neurotoxicol Teratol* 1992;14:329–335.
  35. Lösche G, Steinhausen HC, Koch S, Helge H. The psychological development of children of epileptic parents: II: the differential impact of in utero exposure to anticonvulsant drugs and further influential factors. *Acta Paediatr* 1994;83:961–966.
  36. Hvas CL, Henriksen TB, Ostergaard JR, Dam M. Epilepsy and pregnancy: effect of antiepileptic drugs and lifestyle on birth weight. *Br J Obstet Gynaecol* 2000;107:896–902.
  37. Viinikainen K, Heinonen S, Eriksson K, Kalviainen R. Community-based, prospective, controlled study of obstetric and neonatal outcome of 179 pregnancies in women with epilepsy. *Epilepsia* 2006;47:186–192.
  38. Hiilesmaa VK, Bardy A, Teramo K. Obstetric outcome in women with epilepsy. *Am J Obstet Gynecol* 1985;152:499–504.
  39. Richmond JR, Krishnamoorthy P, Andermann E, Benjamin A. Epilepsy and pregnancy: an obstetric perspective. *Am J Obstet Gynecol* 2004;190:371–379.
  40. Laskowska M, Leszczyrska-Gorzela B, Oleszczuk J. Pregnancy in women with epilepsy. *Gynecol Obstet Invest* 2001;51:99–102.
